# Supplementary material
Source: PubMed Central journal article supplement (PMC2978499)
Supplement: NIHMS248707-supplement-Angew_Chem_Int_Ed__Supporting_Information.pdf [file NIHMS248707-supplement-Angew_Chem_Int_Ed__Supporting_Information.pdf]

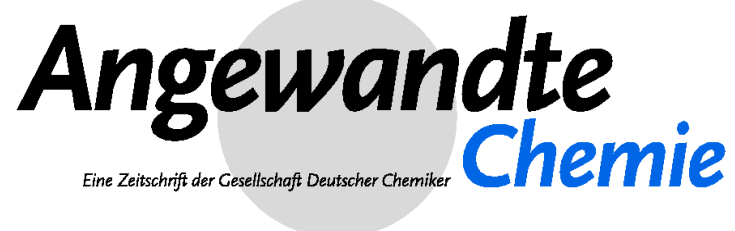

Supporting Information

© Wiley-VCH 2007

69451 Weinheim, Germany

# **Enantioselective Intramolecular Michael Reaction Catalyzed by *N*-Heterocyclic Carbenes**

**Eric M. Phillips, Manabu Wadamoto, Audrey Chan, and Karl A. Scheidt\***

*Department of Chemistry, Northwestern University,  
2145 Sheridan Road, Evanston, Illinois 60208*

## **Table of Contents**

|                                                                         |            |
|-------------------------------------------------------------------------|------------|
| <i>General Information .....</i>                                        | <i>S2</i>  |
| <i>General Procedure for Intramolecular Michael Reaction.....</i>       | <i>S2</i>  |
| <i>Selected NMR Spectra.....</i>                                        | <i>S7</i>  |
| <i>HPLC and GC Traces of Racemic and Enantioenriched Compounds.....</i> | <i>S18</i> |
| <i>X-Ray Crystallography.....</i>                                       | <i>S36</i> |

## General Information

All reactions were carried out under a nitrogen atmosphere in flame-dried glassware with magnetic stirring.  $\text{CH}_2\text{Cl}_2$  was purified by passage through a bed of activated alumina.<sup>1</sup> Reagents were purified prior to use unless otherwise stated following the guidelines of Perrin and Armarego.<sup>2</sup> Purification of reaction products was carried out by flash chromatography using EM Reagent silica gel 60 (230-400 mesh). Analytical thin layer chromatography was performed on EM Reagent 0.25 mm silica gel 60-F plates. Visualization was accomplished with UV light and ceric ammonium nitrate stain or potassium permanganate stain followed by heating. Infrared spectra were recorded on a Perkin Elmer 1600 series FT-IR spectrometer.  $^1\text{H}$ -NMR spectra were recorded on a Varian Inova 500 (500 MHz) spectrometer and are reported in ppm using solvent as an internal standard ( $\text{CDCl}_3$  at 7.26 ppm). Data are reported as (ap = apparent, s = singlet, d = doublet, t = triplet, q = quartet, m = multiplet, b = broad; coupling constant(s) in Hz; integration. Proton-decoupled  $^{13}\text{C}$ -NMR spectra were recorded on a Varian Inova 500 (125 MHz) spectrometer and are reported in ppm using solvent as an internal standard ( $\text{CDCl}_3$  at 77.0 ppm). Mass spectra data were obtained on a Varian 1200 Quadrupole Mass Spectrometer and Micromass Quadro II Spectrometer.

Enals **1a**, **1b**, **1c**, **1d**, **1e**, **9**, and **10** were prepared according to List.<sup>3</sup> Enal **13** was prepared according to Roush.<sup>4</sup>

## General Procedure for Intramolecular Michael Reaction

To a flame-dried 10 mL round bottom flask containing a magnetic stirring bar was added azolium salt **D** (4.2 mg, 0.01 mmol) and the corresponding enal (0.1 mmol). The flask was then sealed with rubber septum and placed under positive pressure of nitrogen. The heterogeneous mixture was then diluted with  $\text{CH}_2\text{Cl}_2$  (2 mL, 0.05 M). Once the material dissolved, diisopropylethylamine (2  $\mu\text{L}$ , 0.01 mmol) was added via syringe. The reaction stirred at 23 °C under  $\text{N}_2$  atmosphere until complete consumption of enal (as observed by thin layer chromatography). Methanol (5 mL) was added to the reaction and stirred at 23 °C under  $\text{N}_2$  for five hours. The mixture was partially concentrated under reduced pressure and the remaining residue was purified by silica gel chromatography (5% EtOAc/Hexanes) affording the pure annulation product.

- 
1. Pangborn, A. B.; Giardello, M. A.; Grubbs, R. H.; Rosen, R. K.; Timmers, F. J. *Organometal.* **1996**, *15*, 1518-1520.
  2. Perrin, D. D. and Armarego, W. L. *Purification of Laboratory Chemicals*; 3rd Ed., Pergamon Press, Oxford. 1988.
  3. Yang, J.-W.; Hechavarria, M.; List, B. *J. Am. Chem. Soc.* **2005**, *127*, 15036-15037
  4. Frank, S. A.; Mergott, D. J.; Roush, W. R. *J. Am. Chem. Soc.* **2002**, *124*, 2404-2405.

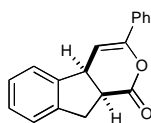

**(4aS,9aS)-3-phenyl-9,9a-dihydro-4aH-2-oxa-fluoren-1-one (3):** Prepared according to general procedure excluding the methanol addition using (*E*)-3-(2-((*E*)-3-oxo-3-phenylprop-1-enyl)phenyl)prop-2-enal (52 mg, 0.2 mmol) to afford 36 mg (68%) of **3** as a white solid. Methanol was not added to quench the reaction. Analytical data for **3**: IR (film) 2914, 2850, 1757, 1199, 1137, 1090, 1022, 757  $\text{cm}^{-1}$ ;  $^1\text{H}$  NMR (500 MHz,  $\text{CDCl}_3$ )  $\delta$  7.65 (d,  $J$  = 7.1 Hz, 2H), 7.31 (m, 7H), 7.37 (d,  $J$  = 4.2 Hz, 1H), 4.25 (m, 1H), 3.54 (m, 2H), 3.42 (m, 1H);  $^{13}\text{C}$  NMR (125 MHz,  $\text{CDCl}_3$ ) 170.55, 148.62, 143.36, 132.58, 129.36, 128.71, 127.86, 127.74, 125.11, 124.98, 123.96, 100.68, 42.74, 42.42, 36.30; LRMS (ES): Mass calcd for  $\text{C}_{18}\text{H}_{14}\text{O}_2$   $[\text{M}+\text{H}]^+$ , 263.1. Found  $[\text{M}+\text{H}]^+$ , 263.1;  $[\alpha]_{\text{D}}$ : 57.5 ( $\text{CHCl}_3$ ,  $c$  = 0.15,  $\text{er}$  = 99.5:0.5). Enantiomeric ratio was measured by HPLC (Chiralcel AD-H, 15% IPA/Hexanes, 1 mL/min,  $\text{Rt}_1$  = 9.14,  $\text{Rt}_2$  = 14.18).

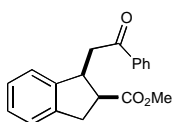

**(1S,2S)-methyl 1-(2-oxo-2-phenylethyl)-2,3-dihydro-1H-indene-2-carboxylate (4):** Prepared according to general procedure using (*E*)-3-(2-((*E*)-3-oxo-3-phenylprop-1-enyl)phenyl)prop-2-enal (52 mg, 0.2 mmol) to afford 40 mg (69%) of **4** as a colorless oil. Analytical data for **4**: IR (film) 3024, 2947, 1730, 1685, 1442, 1365  $\text{cm}^{-1}$ ;  $^1\text{H}$  NMR (500 MHz,  $\text{CDCl}_3$ )  $\delta$  7.95 (d,  $J$  = 7.3 Hz, 2H), 7.57 (t,  $J$  = 7.3 Hz, 1H), 7.46 (t,  $J$  = 7.6 Hz, 2H), 7.27 (d,  $J$  = 6.4 Hz, 1H), 7.19 (m, 3H), 4.28 (q,  $J$  = 7.3 Hz, 1H), 3.59 (m, 4H), 3.42 (m, 2H), 3.15 (m, 2H);  $^{13}\text{C}$  NMR (125 MHz,  $\text{CDCl}_3$ ) 198.72, 174.72, 144.87, 137.26, 133.32, 128.84, 128.26, 127.53, 127.08, 124.81, 124.35, 51.90, 47.69, 42.75, 40.81, 34.73; LRMS (ES): Mass calcd for  $\text{C}_{19}\text{H}_{18}\text{O}_3$   $[\text{M}+\text{H}]^+$ , 295.3. Found  $[\text{M}+\text{H}]^+$ , 295.5;  $[\alpha]_{\text{D}}$ : -16.6 ( $\text{CH}_2\text{Cl}_2$ ,  $c$  = 1.0,  $\text{er}$  = 99.5:0.5). Enantiomeric ratio was measured by HPLC (Chiralcel AD-H, 15% IPA/Hexanes, 1 mL/min,  $\text{Rt}_1$  = 8.84,  $\text{Rt}_2$  = 13.88).

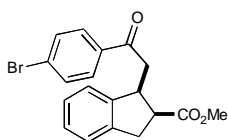

**(1S,2S)-methyl 1-(2-(4-bromophenyl)-2-oxoethyl)-2,3-dihydro-1H-indene-2-carboxylate (5):** Prepared according to general procedure using (*E*)-3-(2-((*E*)-3-(4-bromophenyl)-3-oxoprop-1-enyl)phenyl)prop-2-enal (34 mg, 0.1 mmol) to afford 23 mg (62%) of **5** as a colorless oil. Analytical data for **5**: IR (film) 3023, 2949, 1729, 1687, 1435, 1365  $\text{cm}^{-1}$ ;  $^1\text{H}$  NMR (500 MHz,  $\text{CDCl}_3$ )  $\delta$  7.80 (d,  $J$  = 8.3 Hz, 2H), 7.59 (d,  $J$  = 8.5 Hz, 2H), 7.26 (d,  $J$  = 8.5 Hz, 1H), 7.21 (m, 3H), 4.25 (m, 1H), 3.60 (m, 4H), 3.40 (m, 2H), 3.16 (m, 2H);  $^{13}\text{C}$  NMR (125 MHz,  $\text{CDCl}_3$ )  $\delta$  197.76, 174.72, 144.66, 141.53, 135.94, 132.15, 129.79, 128.50, 127.62, 127.13, 124.86, 124.28, 51.96, 47.57, 42.69, 40.78, 34.74; LRMS (ES): Mass calcd for  $\text{C}_{19}\text{H}_{17}\text{BrO}_3$   $[\text{M}+\text{H}]^+$ , 373.2. Found  $[\text{M}+\text{H}]^+$ , 373.4;  $[\alpha]_{\text{D}}$ : -16.6 ( $\text{CH}_2\text{Cl}_2$ ,  $c$  = 0.5,  $\text{er}$  = 99.5:0.5). Enantiomeric ratio was measured by HPLC (Chiralcel AD-H, 20% IPA/Hexanes, 1 mL/min,  $\text{Rt}_1$  = 8.10,  $\text{Rt}_2$  = 9.40).

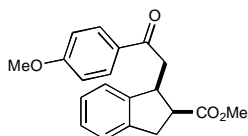

**(1S,2S)-methyl 1-(2-(4-methoxyphenyl)-2-oxoethyl)-2,3-dihydro-1H-indene-2-carboxylate (6):** Prepared according to general procedure using (*E*)-3-(2-((*E*)-3-(4-methoxyphenyl)-3-oxoprop-1-enyl)phenyl)prop-2-enal (29 mg, 0.1 mmol) to afford 26 mg (80%)

of **6** as a yellow oil. Analytical data for **6**: IR (film) 3006, 2949, 2841, 1730, 1674, 1600, 1508  $\text{cm}^{-1}$ ;  $^1\text{H}$  NMR (500 MHz,  $\text{CDCl}_3$ )  $\delta$  7.92 (d,  $J = 7.8$  Hz, 2H), 7.25 (m, 1H), 7.20 (m, 3H), 6.92 (d,  $J = 8.9$  Hz, 2H), 4.26 (m, 1H), 3.87 (s, 3H), 3.59 (m, 4H), 3.37 (m, 2H), 3.10 (m, 2H);  $^{13}\text{C}$  NMR (125 MHz,  $\text{CDCl}_3$ )  $\delta$  197.19, 174.74, 163.71, 144.98, 141.58, 130.53, 130.37, 127.46, 127.04, 113.95, 55.17, 51.90, 47.73, 42.86, 40.37, 34.68; LRMS (ES): Mass calcd for  $\text{C}_{20}\text{H}_{20}\text{O}_4$   $[\text{M}+\text{H}]^+$ , 325.4. Found  $[\text{M}+\text{H}]^+$ , 325.5;  $[\alpha]_{\text{D}}$ : -28.9 ( $\text{CH}_2\text{Cl}_2$ ,  $c = 1.0$ ,  $\text{er} = 99.5:0.5$ ). Enantiomeric ratio was measured by HPLC (Chiralcel AD-H, 15% IPA/Hexanes, 1 mL/min,  $\text{Rt}_1 = 11.41$ ,  $\text{Rt}_2 = 14.05$ ).

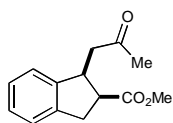

**(1S,2S)-methyl 1-(2-oxopropyl)-2,3-dihydro-1H-indene-2-carboxylate**

**(7)**: Prepared according to general procedure using (*E*)-3-(2-((*E*)-3-oxobut-1-enyl)phenyl)prop-2-enal (20 mg, 0.1 mmol) to afford 14 mg (59%) of **7** as a colorless oil. Analytical data for **7**: IR (film) 3020, 2950, 1727, 1435, 1365  $\text{cm}^{-1}$ ;  $^1\text{H}$  NMR (500 MHz,  $\text{CDCl}_3$ )  $\delta$  7.20 (m, 4H), 4.35 (m, 1H), 3.68 (s, 3H), 3.49 (q,  $J = 8.3$ , 1H), 3.29 (dd,  $J = 15.9$ , 8.9 Hz, 1H), 3.06 (dd,  $J = 15.9$ , 7.9 Hz, 1H), 2.86 (dd,  $J = 18.1$ , 8.3 Hz, 1H), 2.63 (dd,  $J = 11.9$ , 6.1 Hz, 1H), 2.13 (s, 3H);  $^{13}\text{C}$  NMR (125 MHz,  $\text{CDCl}_3$ )  $\delta$  207.33, 174.75, 144.75, 141.43, 127.49, 127.10, 124.78, 124.15, 51.94, 47.44, 45.58, 42.44, 34.60, 30.68; LRMS (ES): Mass calcd for  $\text{C}_{14}\text{H}_{16}\text{O}_3$   $[\text{M}+\text{H}]^+$ , 233.3. Found  $[\text{M}+\text{H}]^+$ , 233.5;  $[\alpha]_{\text{D}}$ : -26.4 ( $\text{CH}_2\text{Cl}_2$ ,  $c = 1.0$ ,  $\text{er} = 99.5:0.5$ ). Enantiomeric ratio was measured by HPLC (Chiralcel AD-H, 1% IPA/Hexanes, 0.5 mL/min,  $\text{Rt}_1 = 23.39$ ,  $\text{Rt}_2 = 25.01$ ).

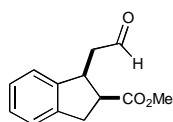

**(1S,2S)-methyl 1-(2-oxoethyl)-2,3-dihydro-1H-indene-2-carboxylate**

**(8)**: Prepared according to general procedure using (*2E,2'E*)-3,3'-(1,2-phenylene)diprop-2-enal (37 mg, 0.2 mmol) to afford 29 mg (68%) of **8** as a colorless oil. Analytical data for **8**: IR (film) 3023, 2922, 1727, 1436, 1367  $\text{cm}^{-1}$ ;  $^1\text{H}$  NMR (500 MHz,  $\text{CDCl}_3$ )  $\delta$  9.80 (s, 1H), 7.24 (m, 4H), 4.07 (m, 1H), 3.70 (s, 3H), 3.53 (q,  $J = 8.2$  Hz, 1H), 3.35 (dd,  $J = 15.9$ , 8.8 Hz, 1H), 3.09 (dd,  $J = 15.9$ , 8.2 Hz, 1H), 2.82 (dd,  $J = 7.6$ , 0.9 Hz, 1H), 2.65 (dd,  $J = 17.7$ , 6.4 Hz, 1H);  $^{13}\text{C}$  NMR (125 MHz,  $\text{CDCl}_3$ )  $\delta$  200.87, 174.24, 144.19, 141.35, 127.70, 127.21, 124.91, 124.20, 51.99, 47.63, 46.11, 41.40, 34.33; LRMS (ES): Mass calcd for  $\text{C}_{13}\text{H}_{14}\text{O}_3$   $[\text{M}+\text{H}]^+$ , 219.3. Found  $[\text{M}+\text{H}]^+$ , 219.6;  $[\alpha]_{\text{D}}$ : -34.8 ( $\text{CH}_2\text{Cl}_2$ ,  $c = 1.0$ ,  $\text{er} = 99.5:0.5$ ). Enantiomeric ratio was measured by HPLC (Chiralcel AD-H, 3% IPA/Hexanes, 1 mL/min,  $\text{Rt}_1 = 8.33$ ,  $\text{Rt}_2 = 9.14$ ).

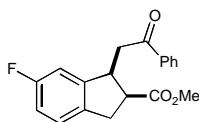

**(1S,2S)-methyl 6-fluoro-1-(2-oxo-2-phenylethyl)-2,3-dihydro-1H-indene-2-carboxylate**

**(10)**: Prepared according to general procedure using (*2E,2'E*)-3,3'-(4-fluoro-1,2-phenylene)diprop-2-enal (56 mg, 0.2 mmol) to afford 42 mg (68%) of **10** as a colorless oil. Analytical data for **10**: IR (film) 3060, 2951, 2851, 1732, 1685, 1597, 1436, 1230, 1168, 813, 753, 690  $\text{cm}^{-1}$ ;  $^1\text{H}$  NMR (500 MHz,  $\text{CDCl}_3$ )  $\delta$  7.93 (d,  $J = 7.9$  Hz, 2H), 7.56 (t,  $J = 7.6$  Hz, 1H), 7.45 (t,  $J = 7.6$  Hz, 2H), 7.16 (m, 2H), 6.88 (m, 2H), 4.23 (q,  $J = 7.3$  Hz, 1H), 3.62 (q,  $J = 7.9$  Hz, 1H), 3.56 (s, 3H), 3.40 (dd,  $J = 17.7$ , 17.7 Hz, 1H), 3.30 (dd,  $J = 15.6$ , 7.9 Hz, 1H), 3.14 (dd,  $J = 17.7$ , 6.4 Hz, 1H), 3.06 (dd,  $J = 15.6$ , 7.9 Hz, 1H);  $^{13}\text{C}$  NMR (125 MHz,  $\text{CDCl}_3$ )  $\delta$  198.34, 174.38, 163.40, 161.46, 146.98, 146.92, 137.08, 136.90, 133.45,

128.24, 125.69, 125.63, 114.47, 114.29, 111.68, 111.50, 51.95, 48.20, 42.68, 40.42, 33.90; LRMS (ES): Mass calcd for  $C_{19}H_{17}FO_3$   $[M+H]^+$ , 313.3. Found  $[M+H]^+$ , 313.4;  $[\alpha]_D$ : -21.9 ( $CH_2Cl_2$ ,  $c = 1.0$ ,  $er = 99.5:0.5$ ). Enantiomeric ratio was measured by HPLC (Chiralcel OD-H, 2.5% EtOH/2.5% IPA/95% Hexanes, 1 mL/min,  $R_{t1} = 8.80$ ,  $R_{t2} = 9.54$ ).

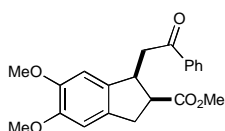

**(1S,2S)-methyl 5,6-dimethoxy-1-(2-oxo-2-phenylethyl)-2,3-dihydro-1H-indene-2-carboxylate (12):** Prepared according to general procedure using (2*E*,2'*E*)-3,3'-(4,5-dimethoxy-1,2-phenylene)diprop-2-enal (32 mg, 0.1 mmol) to afford 26 mg (73%) of **12** as a yellow solid. Analytical data for **12**: IR (film) 3061, 2948, 1729, 1684, 1563, 1449  $cm^{-1}$ ;  $^1H$  NMR (500 MHz,  $CDCl_3$ )  $\delta$  7.92 (d,  $J = 7.3$  Hz, 2H), 7.55 (m, 1H), 7.45 (m, 2H), 6.78 (s, 1H), 6.74 (s, 1H), 4.20 (m, 1H), 3.87 (s, 3H), 3.80 (s, 3H), 3.60 (m, 4H), 3.35 (m, 2H), 3.12 (dd,  $J = 17.4, 6.7$  Hz, 1H), 3.05 (dd,  $J = 15.5, 8.3$  Hz, 1H);  $^{13}C$  NMR (125 MHz,  $CDCl_3$ )  $\delta$  199.04, 174.64, 148.92, 148.49, 137.33, 136.39, 133.34, 133.00, 128.25, 107.82, 107.74, 56.27, 56.25, 51.92, 48.24, 42.84, 40.91, 34.46; LRMS (ES): Mass calcd for  $C_{21}H_{22}O_5$   $[M+H]^+$ , 355.4. Found  $[M+H]^+$ , 355.4;  $[\alpha]_D$ : -9.3 ( $CH_2Cl_2$ ,  $c = 1.0$ ,  $er = 99.5:0.5$ ). Enantiomeric ratio was measured by HPLC (Chiralcel AD-H, 15% IPA/Hexanes, 1 mL/min,  $R_{t1} = 8.29$ ,  $R_{t2} = 10.99$ ).

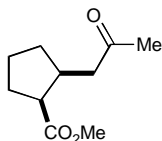

**(1S,2S) methyl 2-(2-oxopropyl)cyclopentanecarboxylate (14):** To a flame-dried 50 mL round bottom flask was added azolium salt **D** (46 mg, 0.11 mmol). The flask was then sealed with rubber septum and put  $N_2$  atmosphere. A mixture of (2*E*,6*E*)-8-oxonona-2,6-dienal (80 mg, 0.53 mmol) and  $CH_2Cl_2$  (10 mL, 0.05 M) was added via syringe. Diisopropylethylamine (18.6  $\mu L$ , 0.11 mmol) was then added via syringe. The reaction stirred at 23  $^{\circ}C$  under  $N_2$  atmosphere. Methanol (20 mL) and diisopropylethylamine (0.53 mmol) were added to the reaction after six hours. The reaction was then stirred under nitrogen at 23  $^{\circ}C$  for 12 hr. The mixture was then taken up in pentane and washed with water. The layers were then separated. The aqueous layer was then extracted with pentane (2 x 20 mL). The combined organic layers were dried with  $Na_2SO_4$ , filtered, and condensed under reduced pressure. The mixture was then purified by flash chromatography on silica gel (25% ether/pentane) to afford 64 mg (66%) of **14** as a yellow oil. Analytical data for **14**: IR (film) 2953, 2872, 1730, 1721, 1435, 1361, 1168  $cm^{-1}$ ;  $^1H$  NMR (500 MHz,  $CDCl_3$ )  $\delta$  3.66 (s, 3H), 2.93 (m, 1H), 2.61 (m, 2H), 2.41 (m, 1H), 2.14 (s, 3H), 1.90 (m, 4H), 1.54 (m, 1H), 1.32 (m, 1H);  $^{13}C$  NMR (125 MHz,  $CDCl_3$ )  $\delta$  208.14, 176.06, 51.51, 46.64, 45.36, 38.37, 31.63, 30.50, 28.62, 23.83; LRMS (ES): Mass calcd for  $C_{10}H_{16}O_3$   $[3M+Na]^+$ , 575.3. Found  $[3M+Na]^+$ , 575.8;  $[\alpha]_D$ : 42.2 ( $CHCl_3$ ,  $c = 0.5$ ,  $er = 99.5:0.5$ ). Enantiomeric ratio was measured by GC (Beta Dex 225, 23.00 psi, 80  $^{\circ}C$  – 170  $^{\circ}C$ ,  $R_{t1} = 33.81$ ,  $R_{t2} = 34.05$ ).

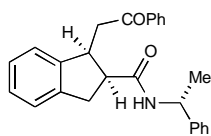

**(1S,2S)-1-(2-oxo-2-phenylethyl)-N-((R)-1-phenylethyl)-2,3-dihydro-1H-indene-2-carboxamide (17):** Prepared according to general procedure using (*E*)-3-(2-((*E*)-3-oxo-3-phenylprop-1-enyl)phenyl)prop-2-enal (52 mg, 0.2 mmol) to afford 70 mg (68%) of **17** as a white solid. Upon consumption of enal, (*S*)- $\alpha$ -methyl benzylamine (3 equiv.) was added via syringe to the reaction flask after 3 hr. The reaction stirred at 23 °C for an additional 6 hr. Analytical data for **17**: IR (film) 3315, 3062, 3029, 2974, 2928, 1682, 1640, 1534, 1239, 1215, 1000, 747, 691 cm<sup>-1</sup>; <sup>1</sup>H NMR (500 MHz, CDCl<sub>3</sub>)  $\delta$  7.78 (d, *J* = 7.7 Hz, 2H), 7.55 (t, *J* = 7.3 Hz, 1H), 7.40 (t, *J* = 7.5 Hz, 2H), 7.26 (d, *J* = 7.7 Hz, 1H), 7.15 (m, 6H), 7.06 (m, 2H), 6.06 (d, *J* = 7.3 Hz, 1H), 4.98 (m, 1H), 4.12 (m, 1H), 3.42 (m, 2H), 3.21 (m, 2H), 3.09 (m, 1H) 1.43 (d, *J* = 6.9 Hz, 3H); <sup>13</sup>C NMR (125 MHz, CDCl<sub>3</sub>)  $\delta$  199.67, 172.61, 144.93, 143.36, 142.34, 137.03, 133.27, 128.71, 128.33, 127.39, 127.37, 126.84, 126.38, 124.69, 124.02, 49.38, 49.22, 42.87, 40.47, 35.13, 22.04; LRMS (electrospray): Mass calcd for C<sub>26</sub>H<sub>25</sub>NO<sub>2</sub> [M+H]<sup>+</sup>, 384.2. Found [M+H]<sup>+</sup>, 384.7; [ $\alpha$ ]<sub>D</sub>: -100.0 (MeOH, c = 0.3, er = 99.5:0.5).

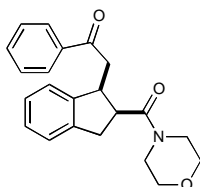

**2-((1S,2S)-2-(morpholine-4-carbonyl)-2,3-dihydro-1H-inden-1-yl)-1-phenylethanone (18):** Prepared according to general procedure using (*E*)-3-(2-((*E*)-3-oxo-3-phenylprop-1-enyl)phenyl)prop-2-enal (52 mg, 0.2 mmol) to afford 49 mg (70%) of **18** as a white solid. Upon consumption of the enal, morpholine (5 equiv.) was added via syringe to the reaction flask after 3 hr. The reaction stirred at room temperature for an additional 3 hr. Solvent was then removed *in vacuo*. The mixture was purified via flash chromatography on silica gel (15% EtOAc/Hexanes). Analytical data for **16**: IR (film) 3062, 2960, 2586, 1682, 1634, 1442, 1230, 1115 cm<sup>-1</sup>; <sup>1</sup>H NMR (500 MHz, CDCl<sub>3</sub>)  $\delta$  7.92 (d, *J* = 7.6 Hz, 2H), 7.54 (m, 1H), 7.43 (m, 2H), 7.27 (d, *J* = 4.9 Hz, 1H), 7.20 (m, 3H), 4.21 (m, 1H), 3.60 (m, 11H), 2.94 (m, 2H); <sup>13</sup>C NMR (125 MHz, CDCl<sub>3</sub>)  $\delta$  198.75, 171.57, 145.28, 141.95, 137.10, 133.36, 128.77, 127.43, 124.76, 124.22, 66.84, 66.62, 46.30, 44.88, 42.15, 42.09, 40.81, 35.00; LRMS (ES): Exact mass calcd for C<sub>22</sub>H<sub>23</sub>NO<sub>3</sub> [2M+Na]<sup>+</sup>, 721.3. Found [2M+Na]<sup>+</sup>, 721.9; [ $\alpha$ ]<sub>D</sub>: -72.4 (CH<sub>2</sub>Cl<sub>2</sub>, c = 1.0, er = 99.5:0.5).

## Selected NMR Spectra

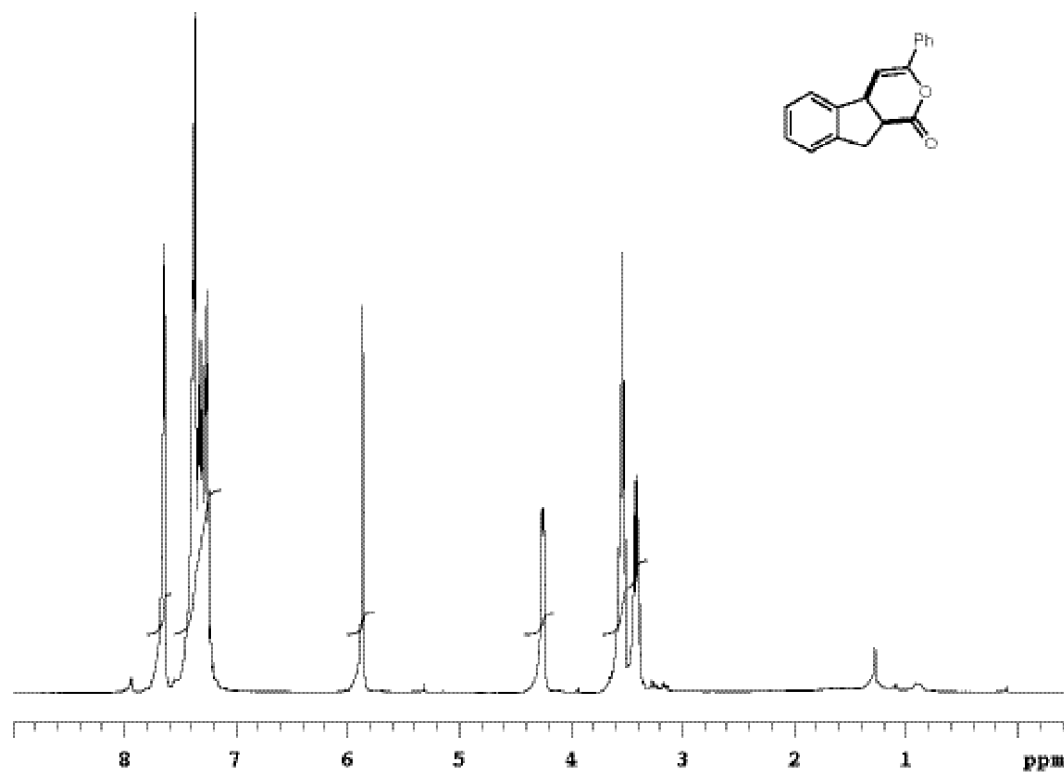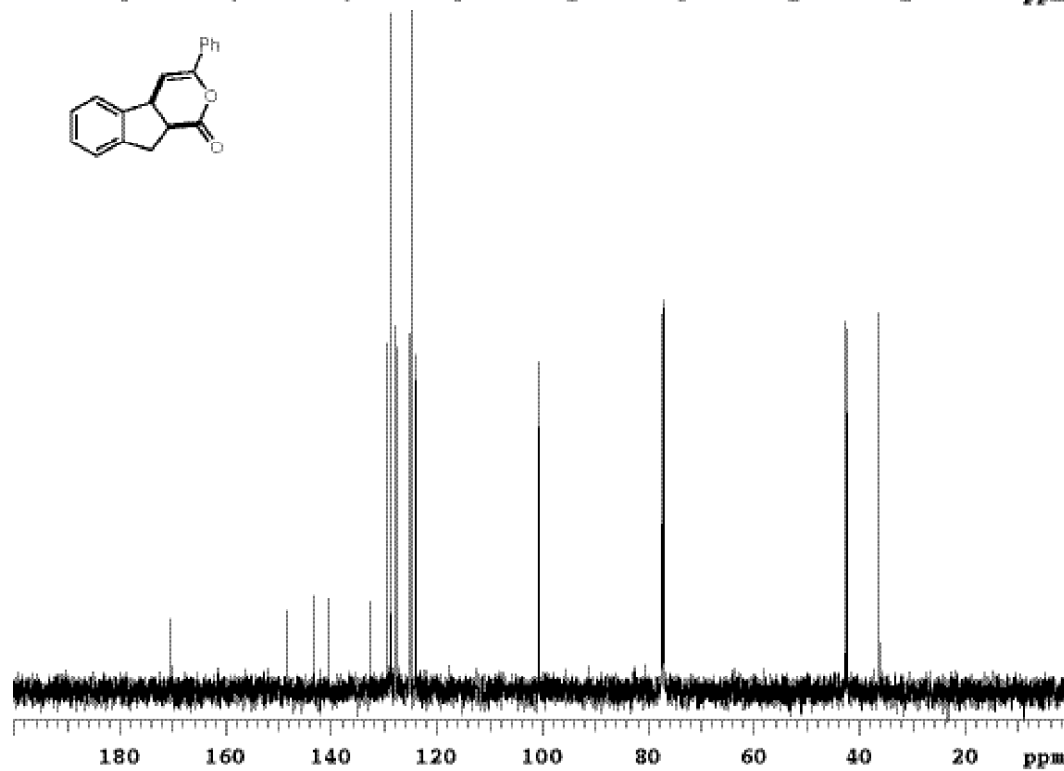

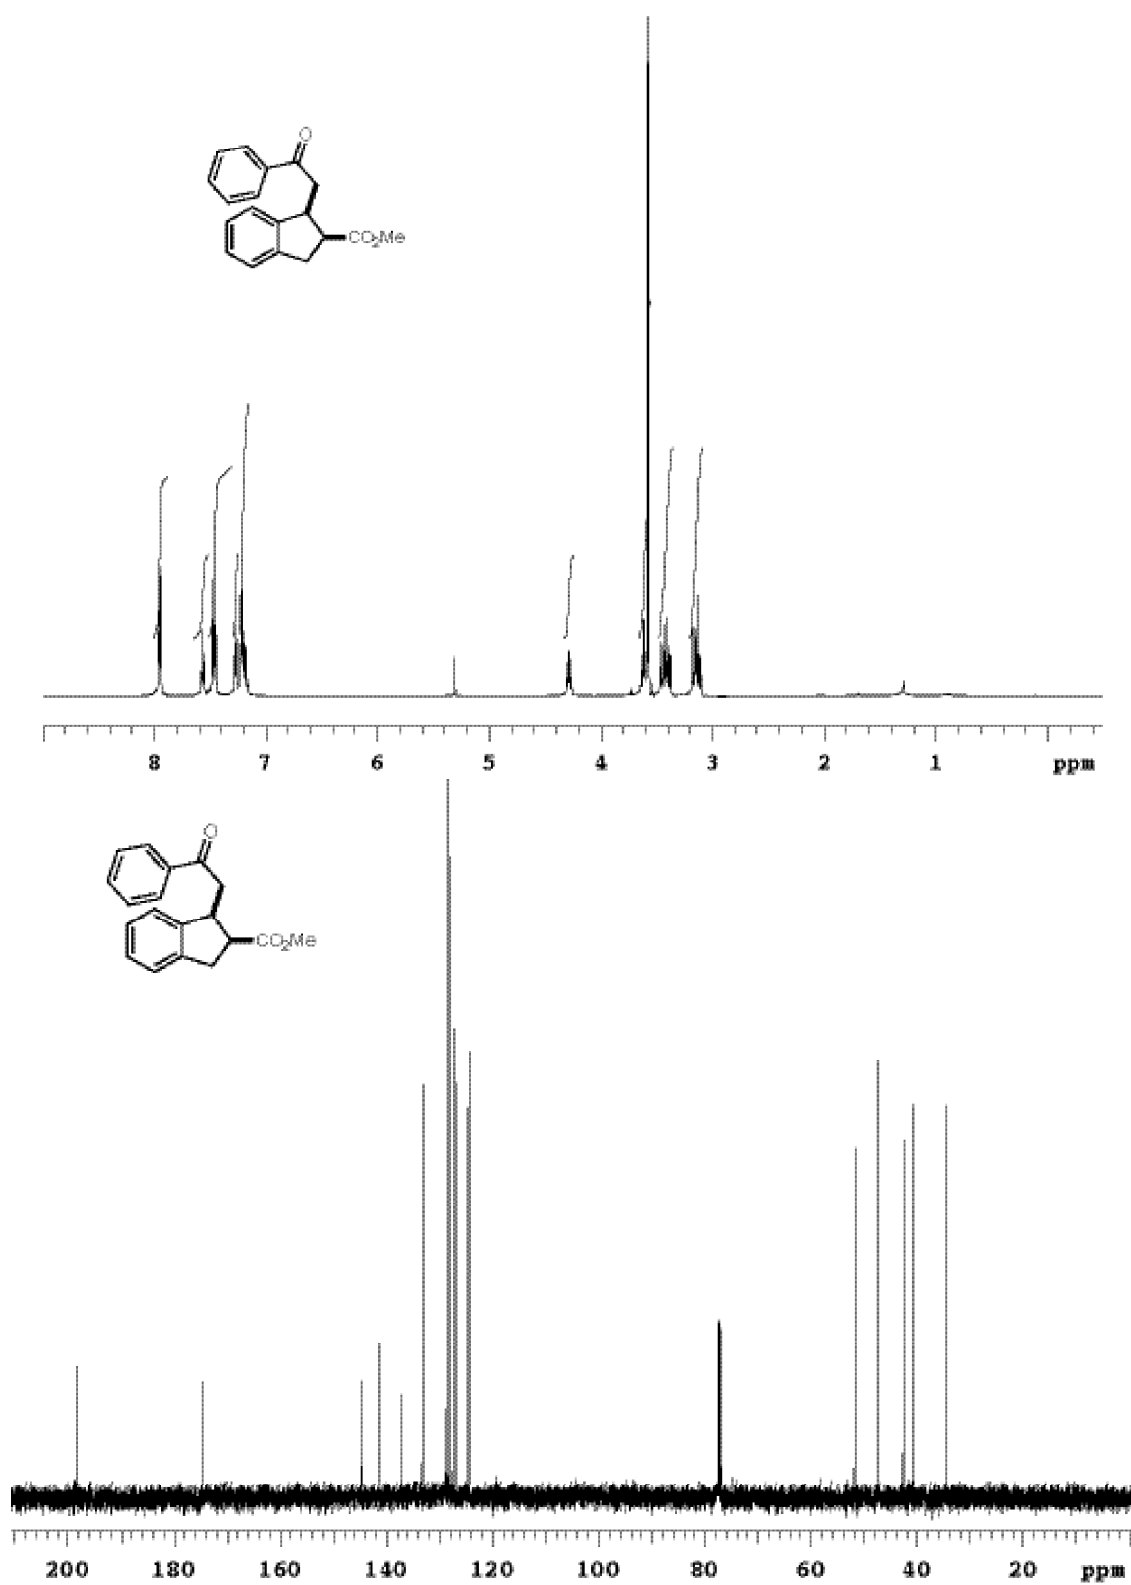

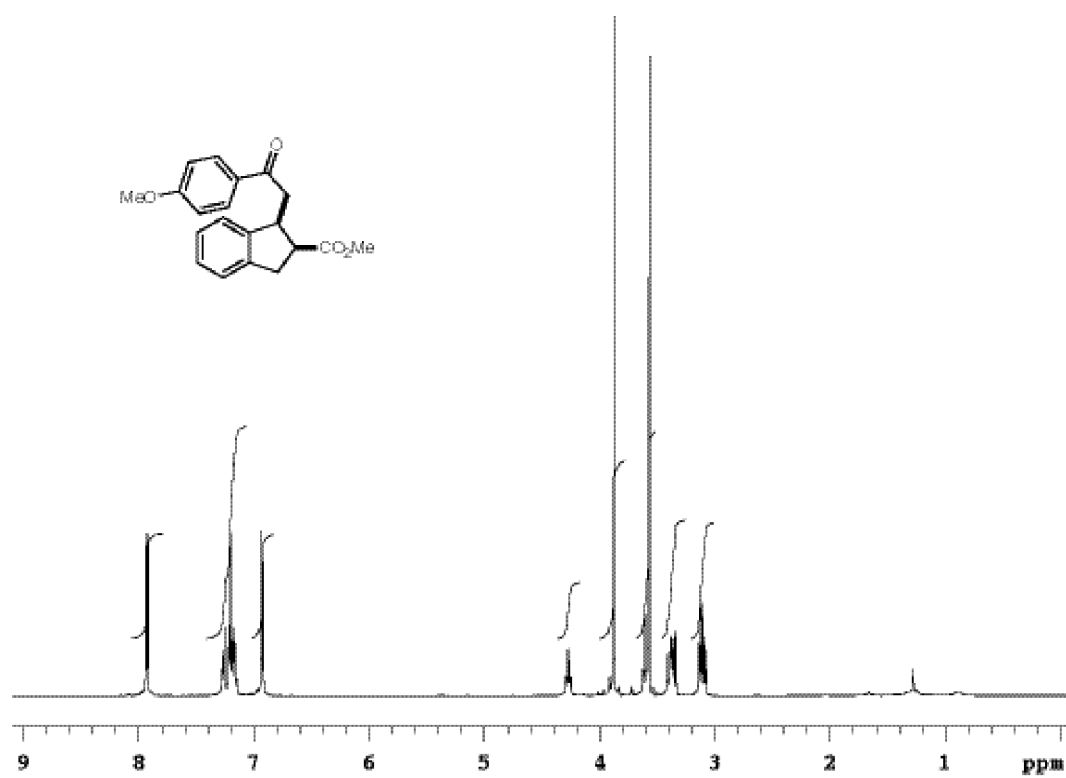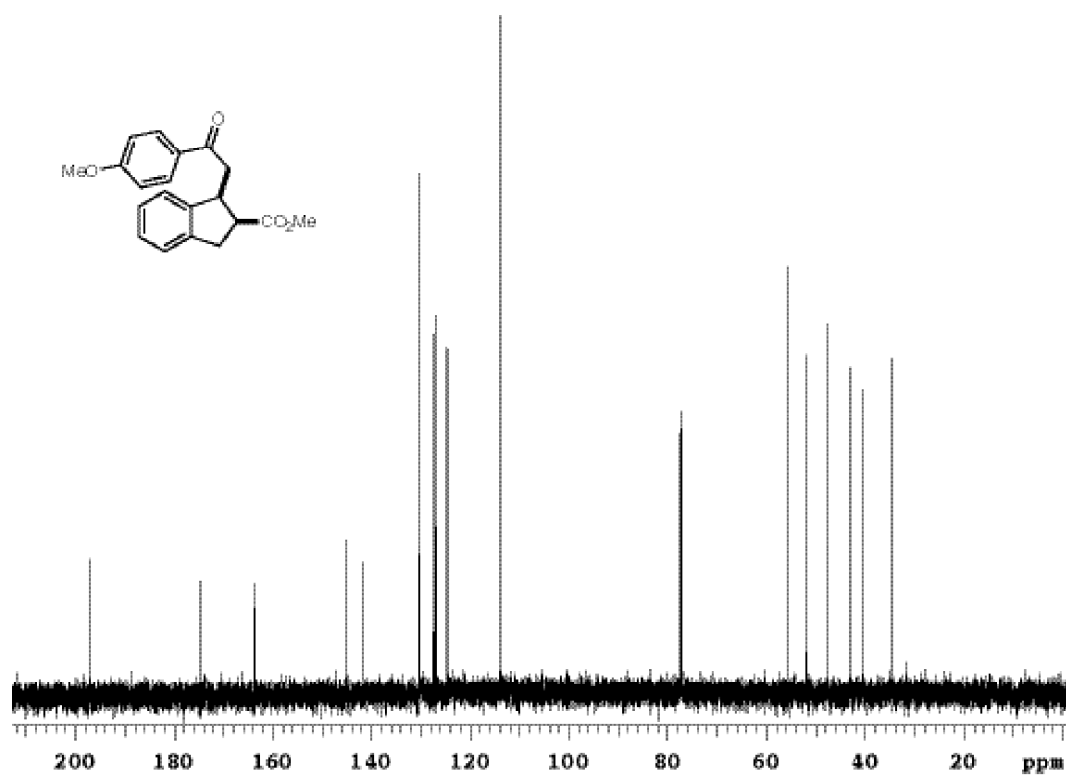

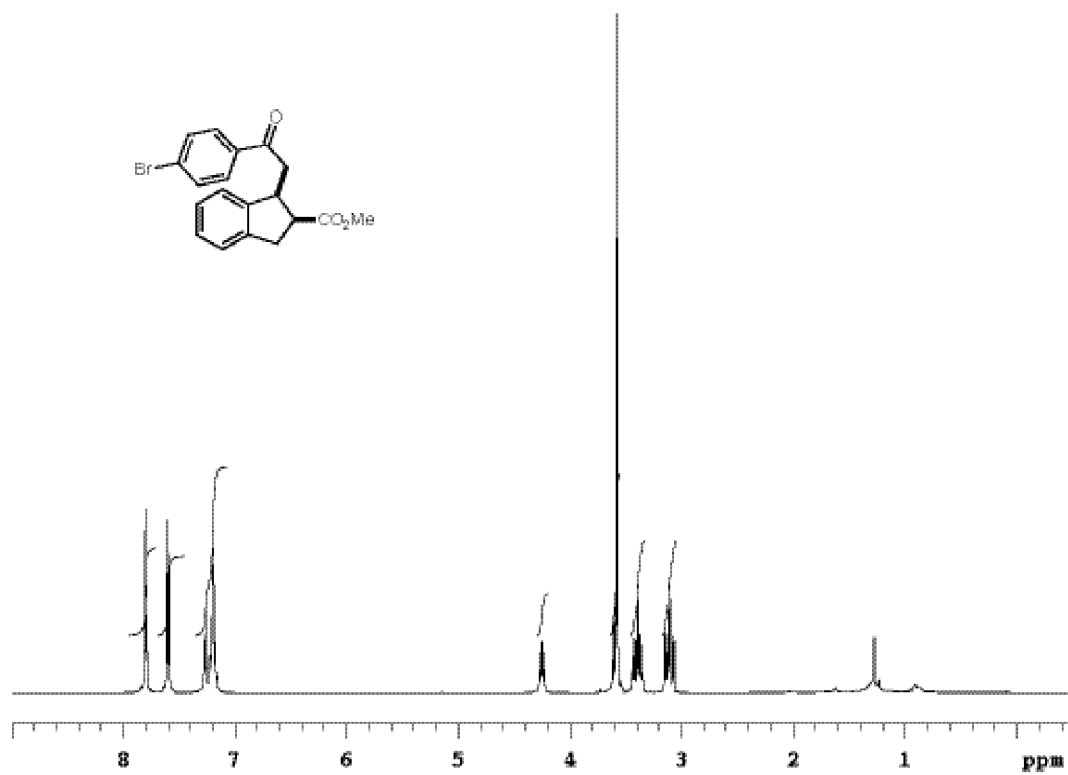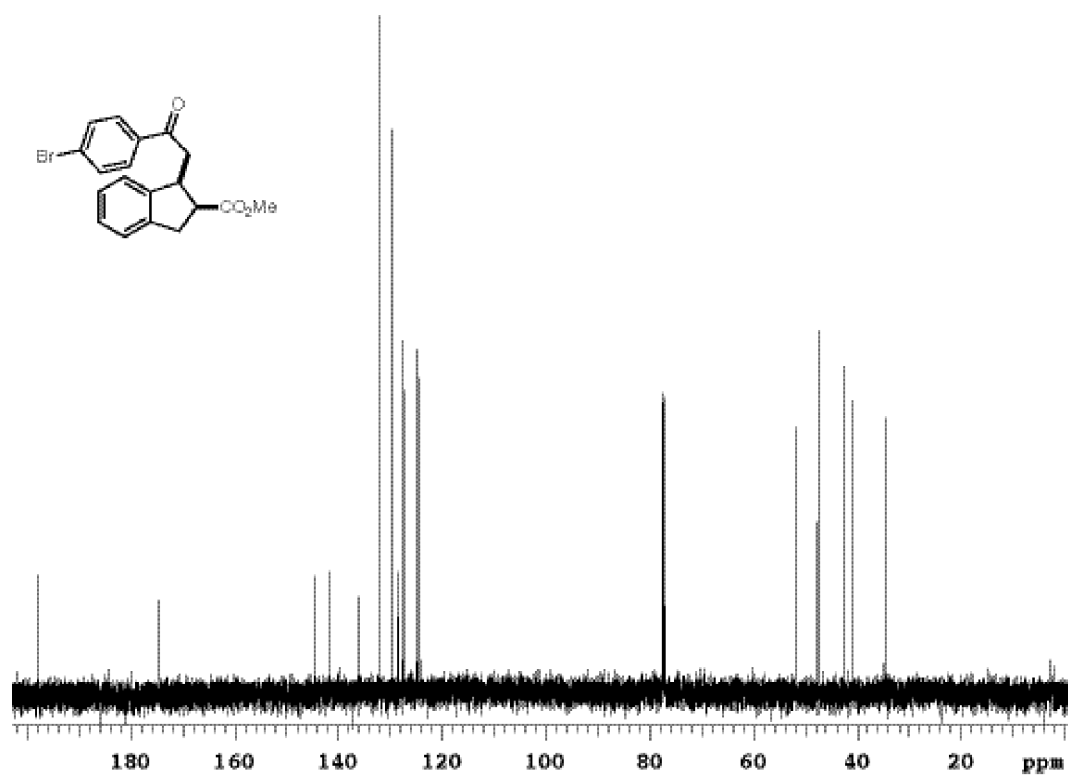

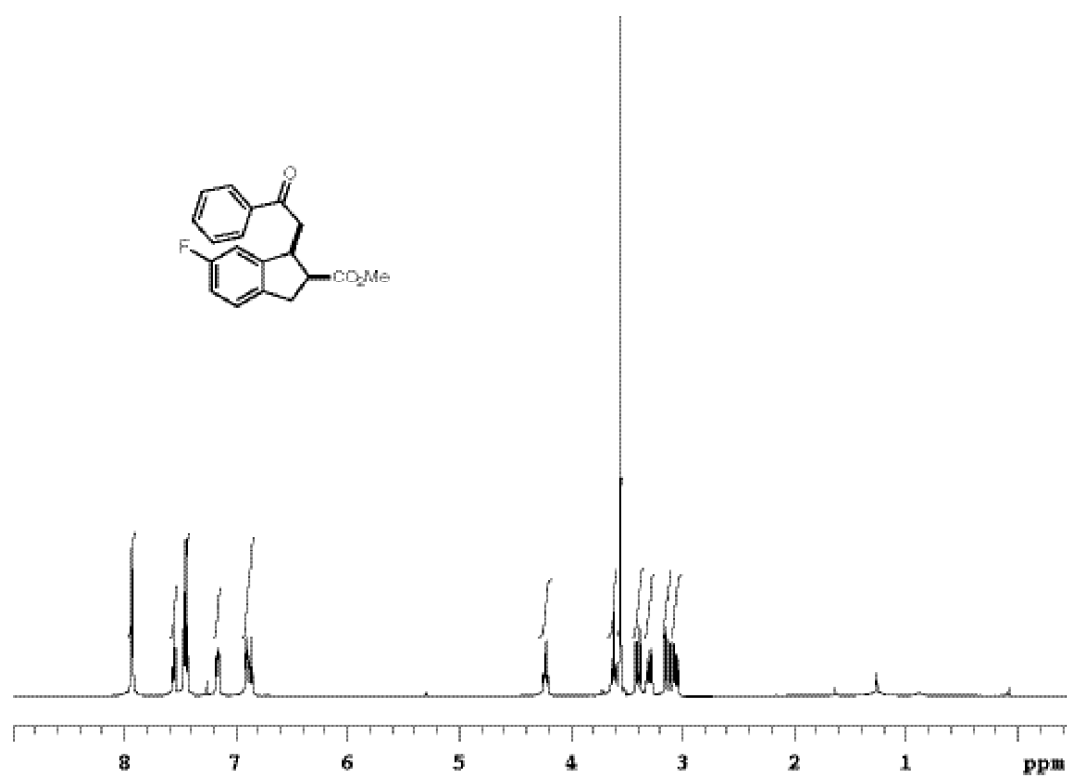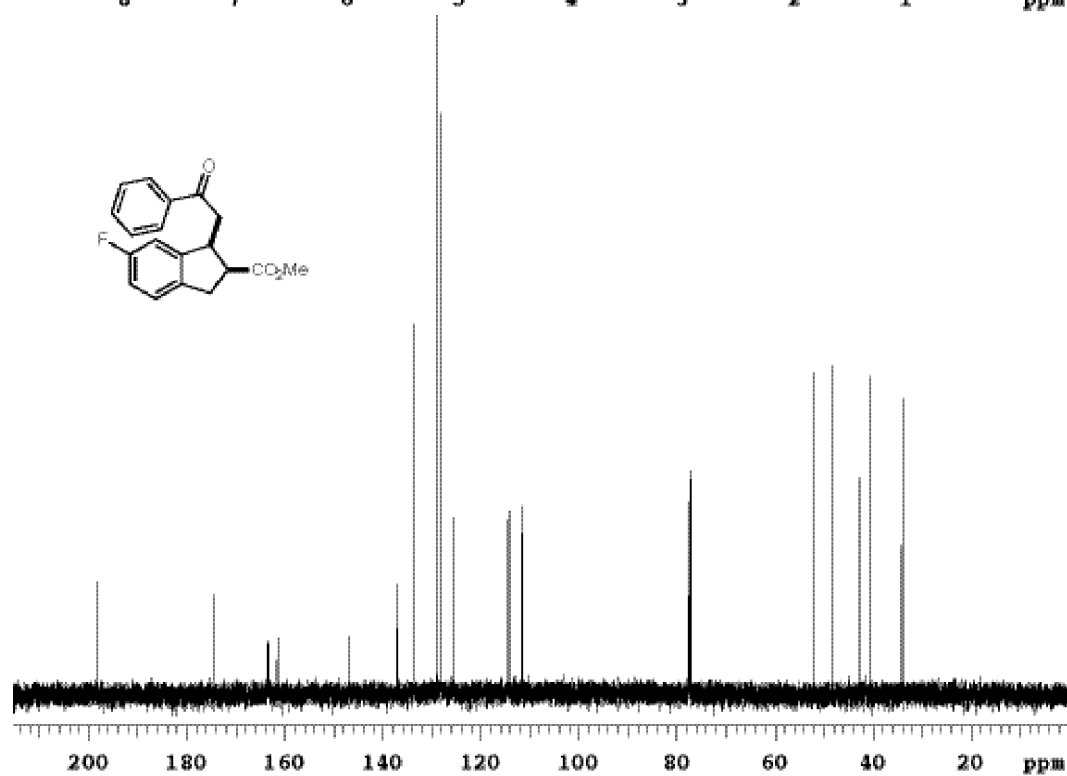

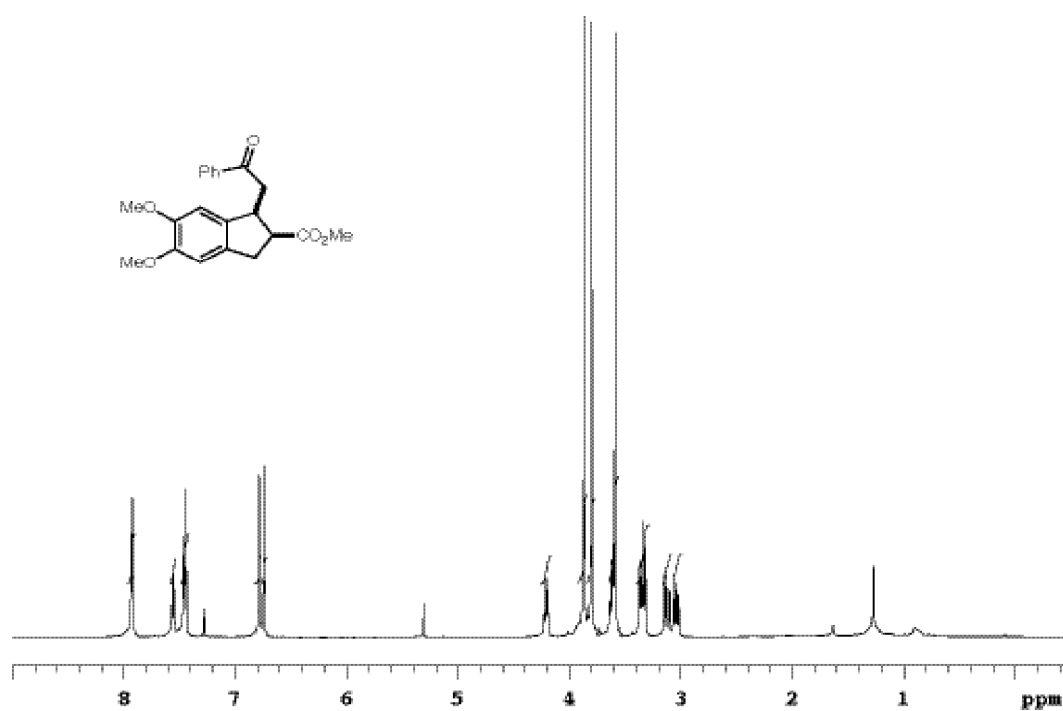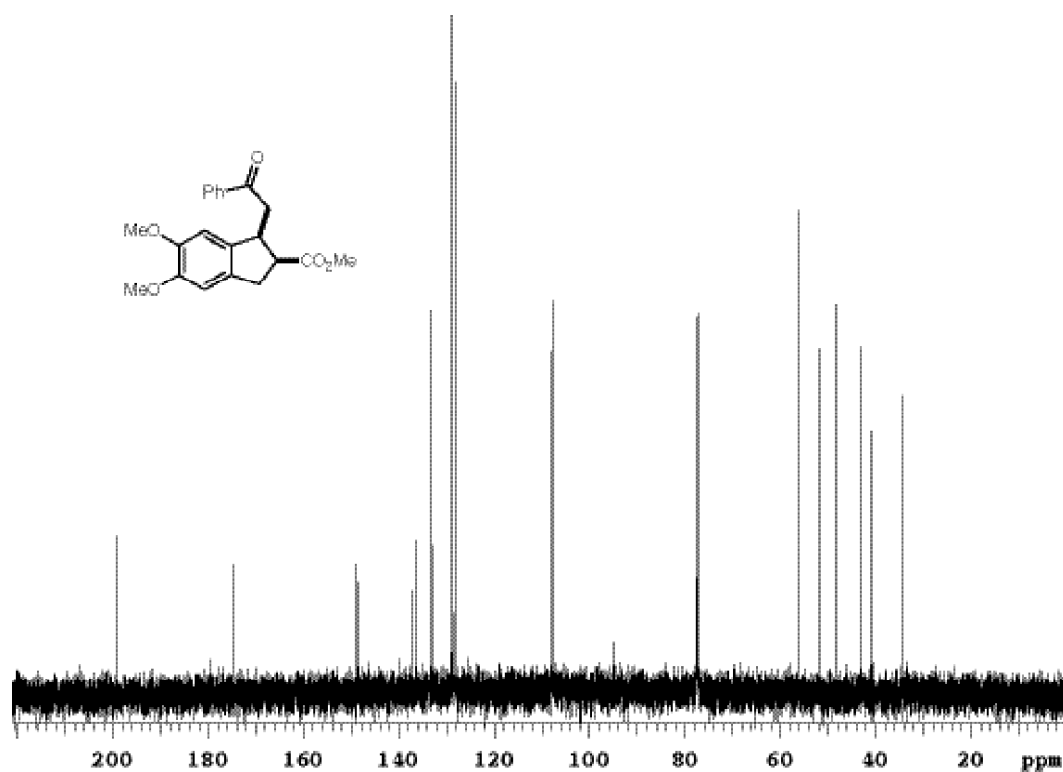

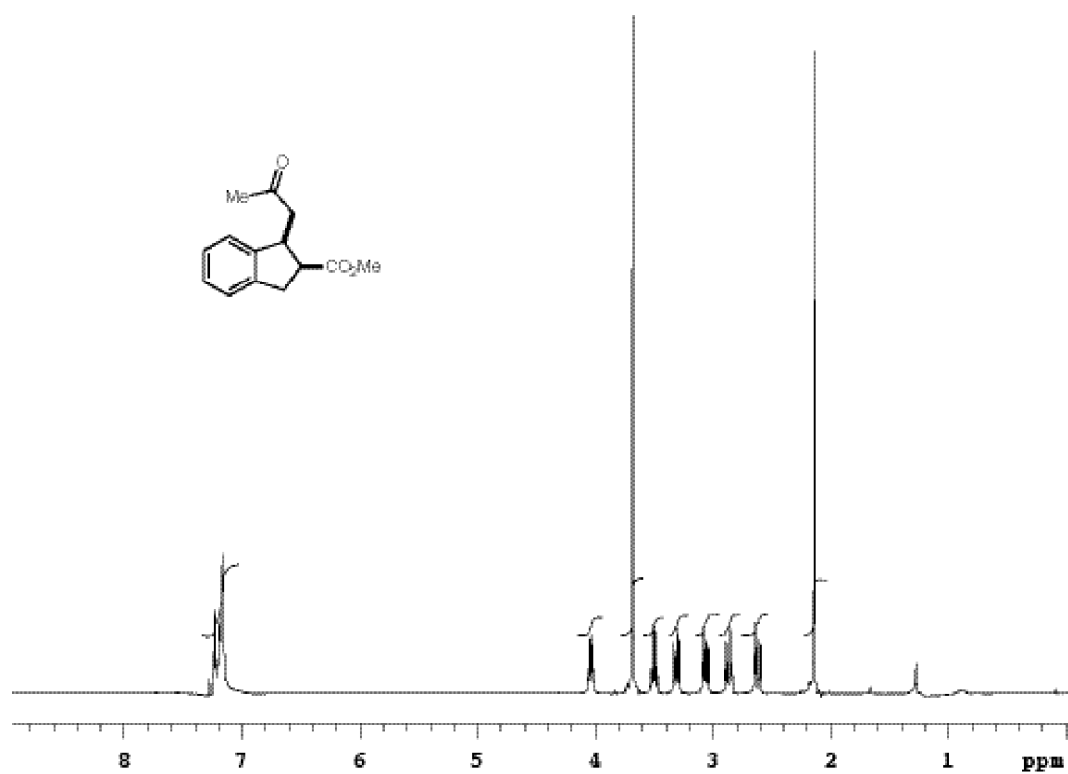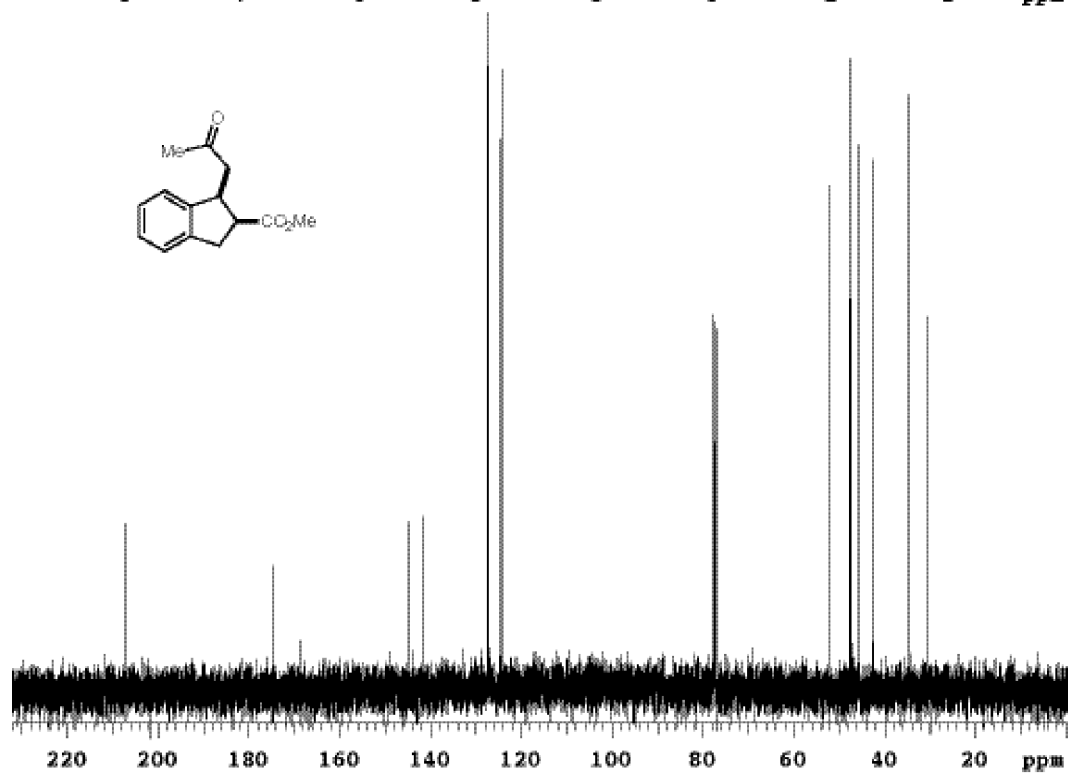

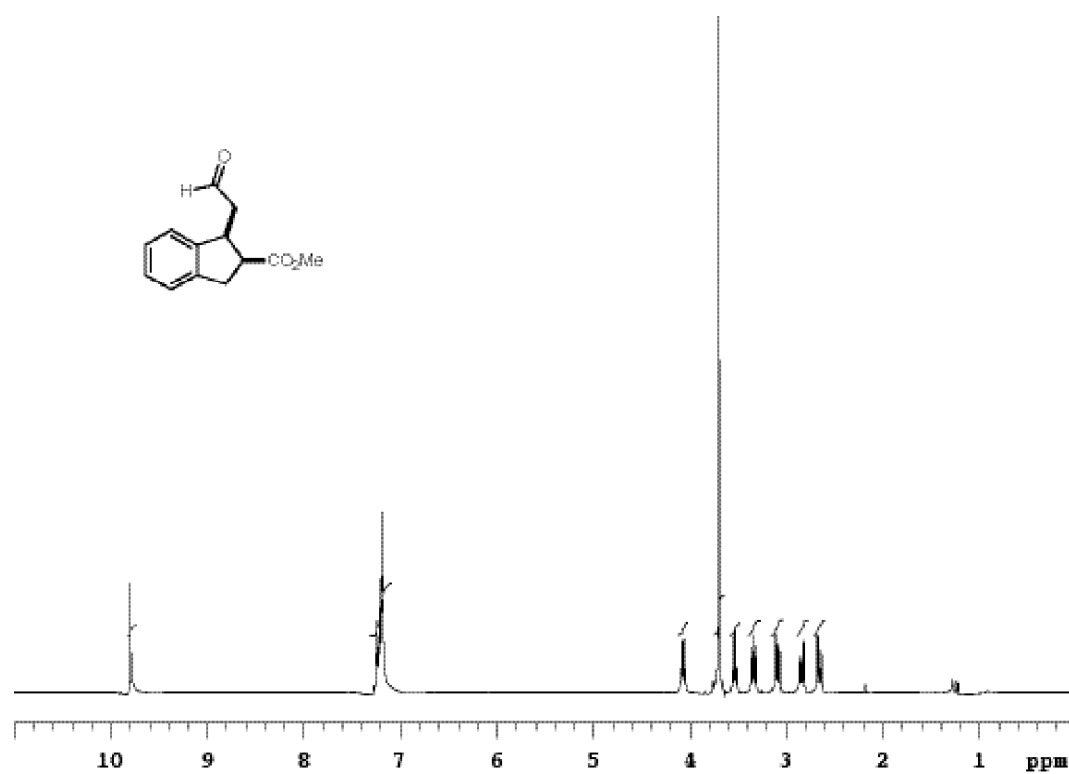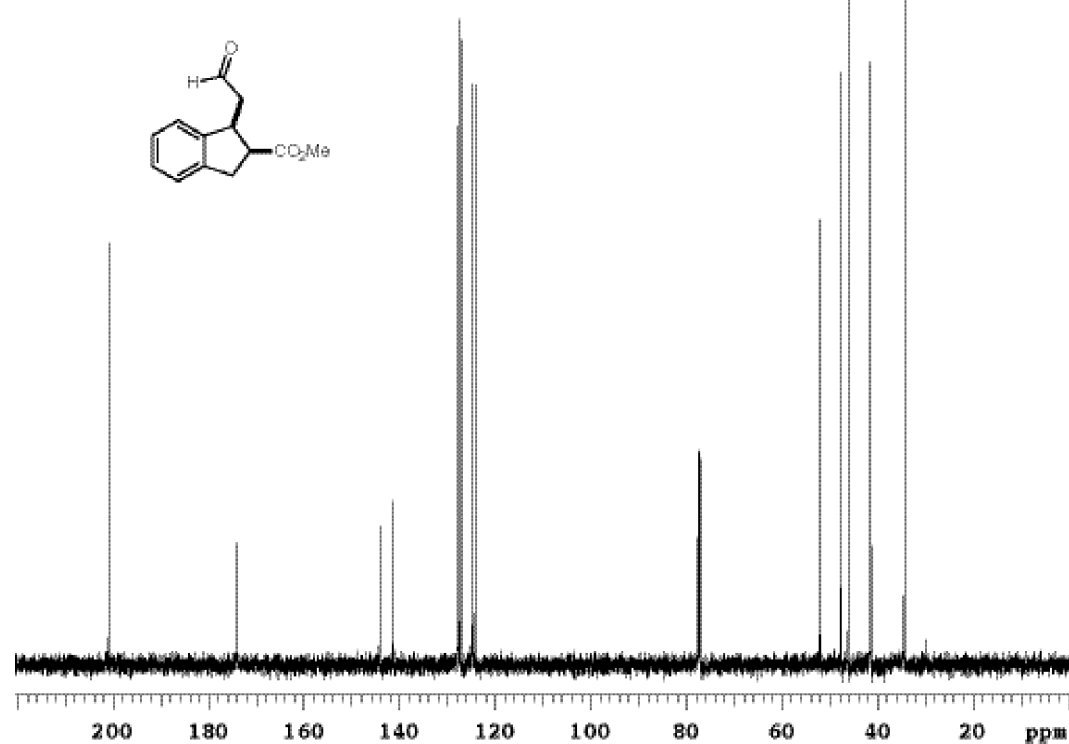

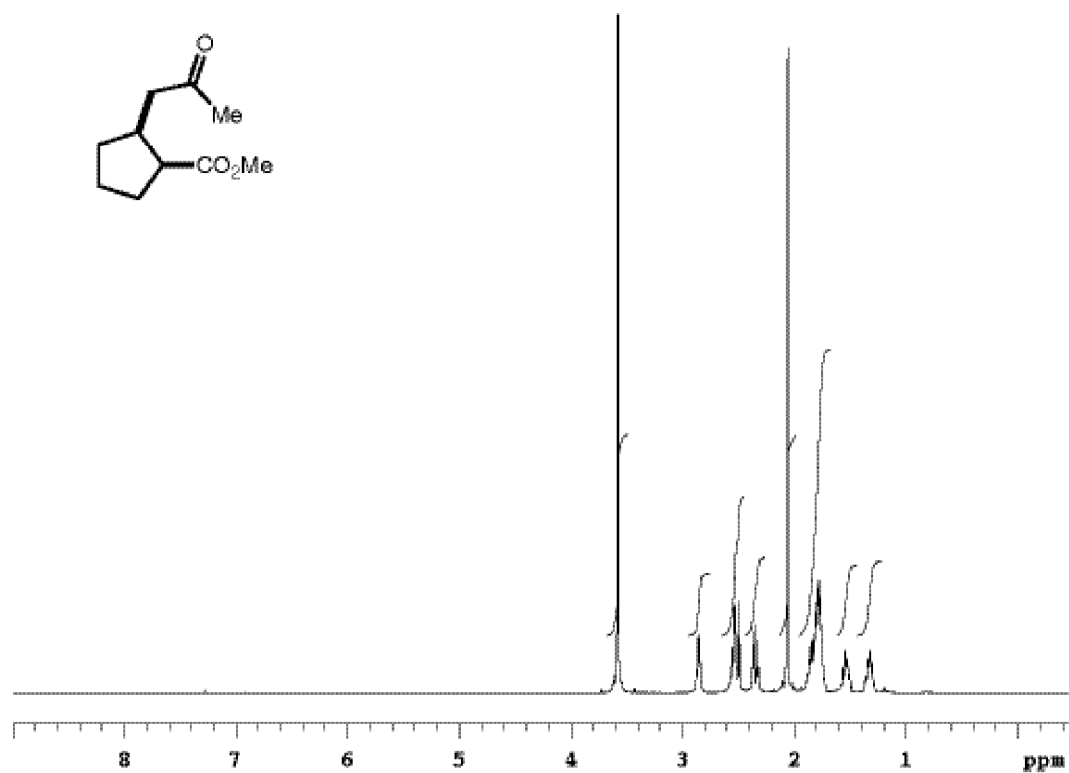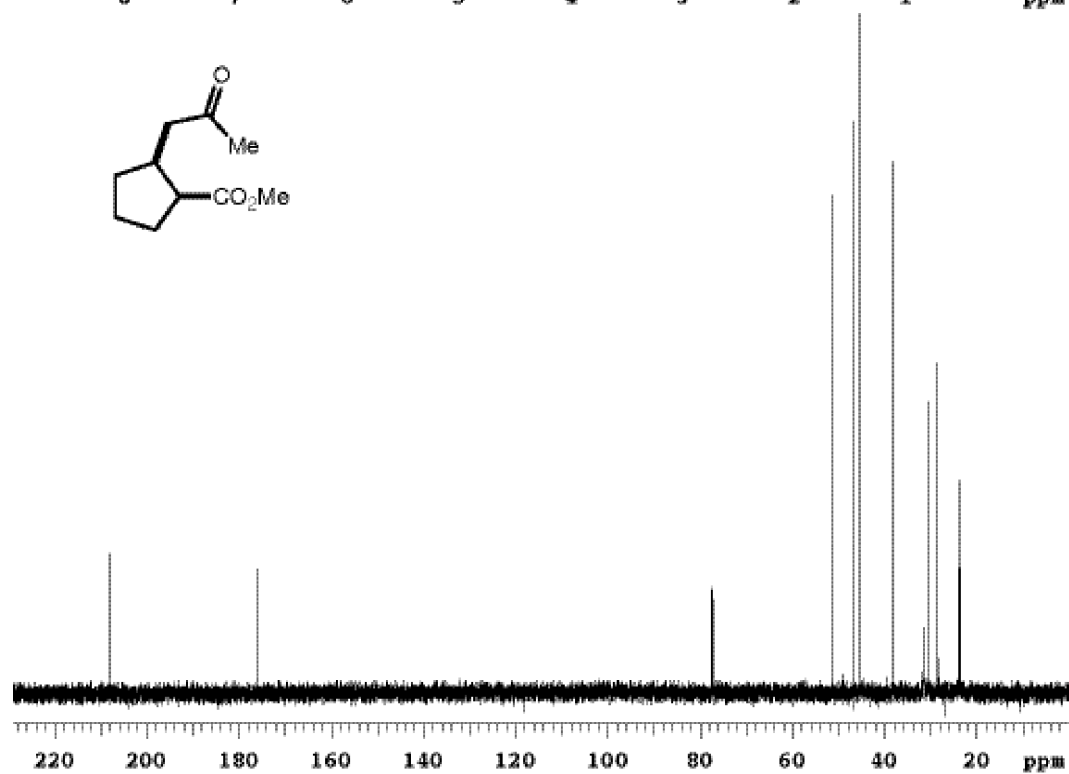

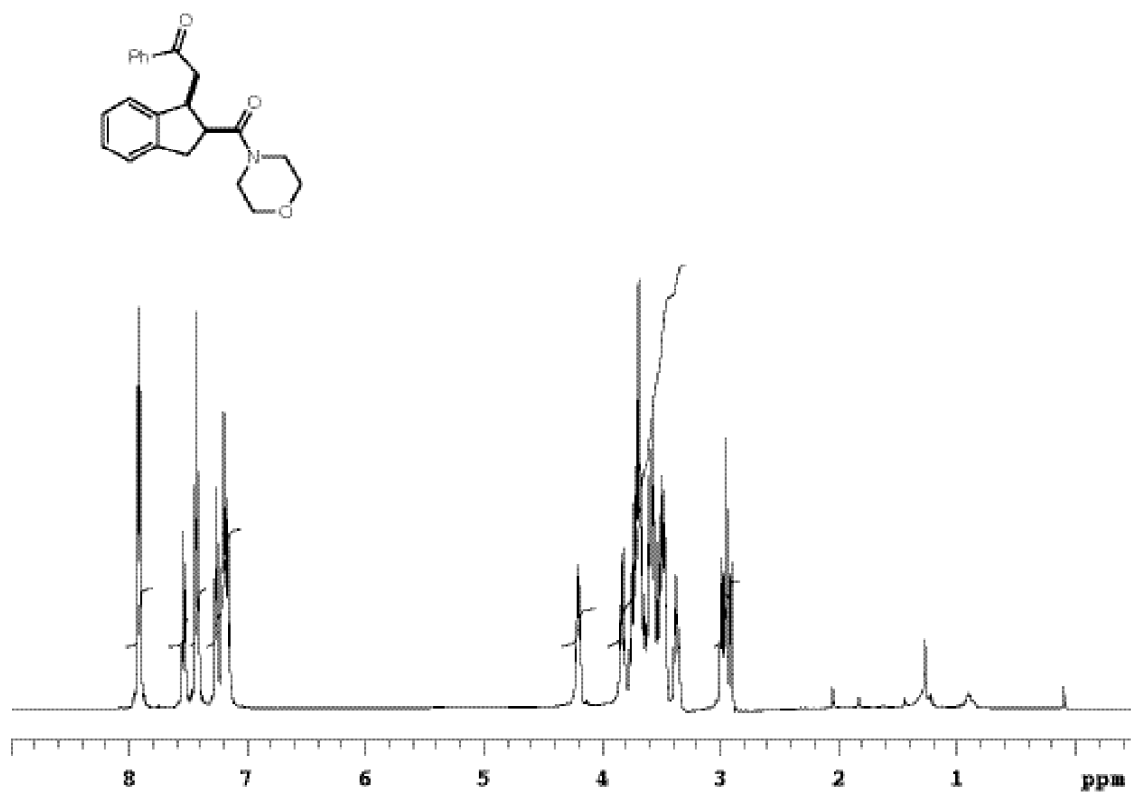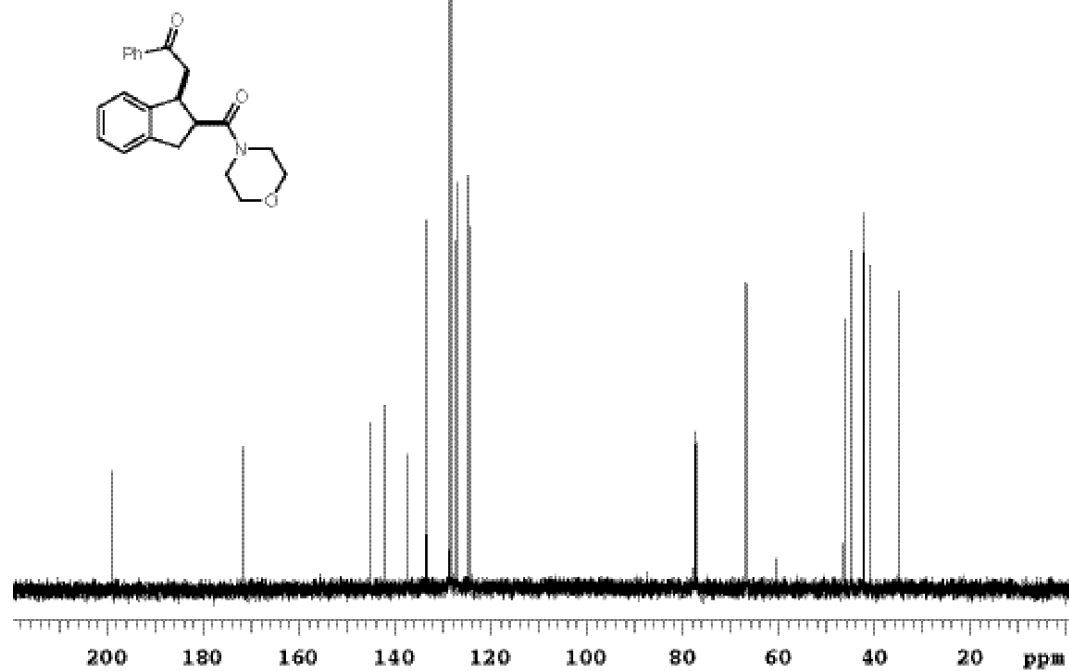

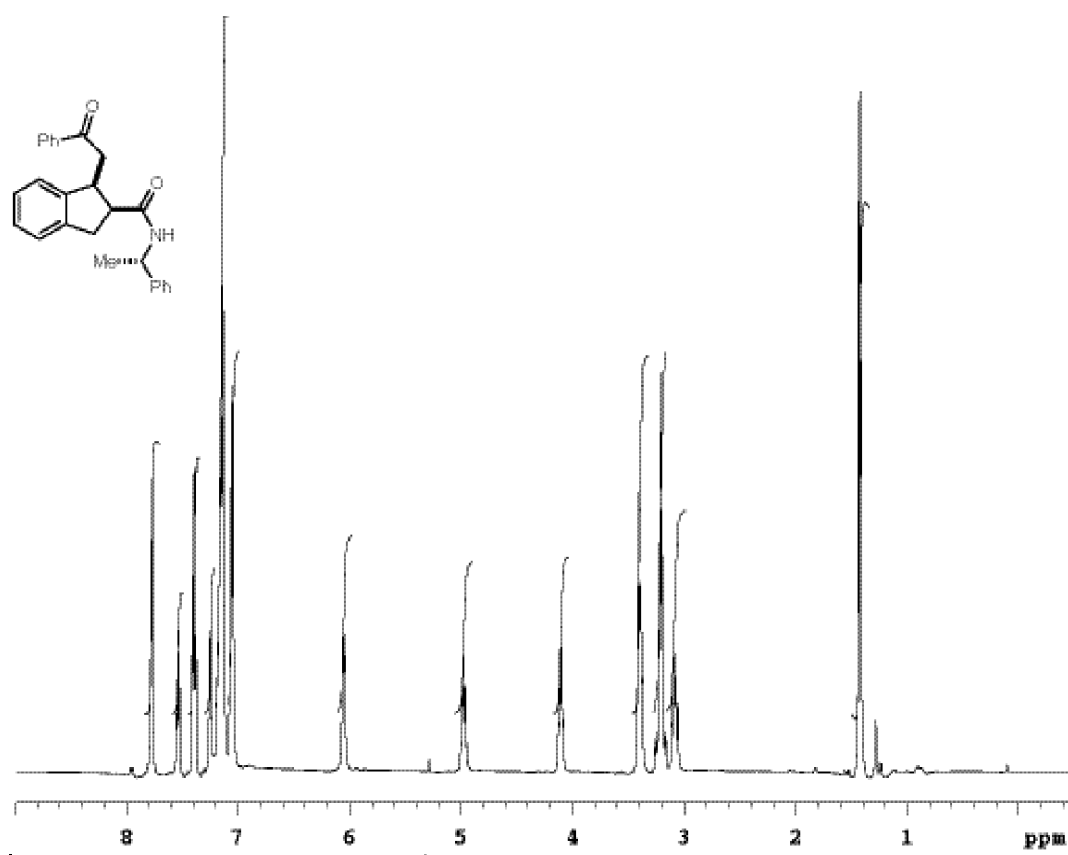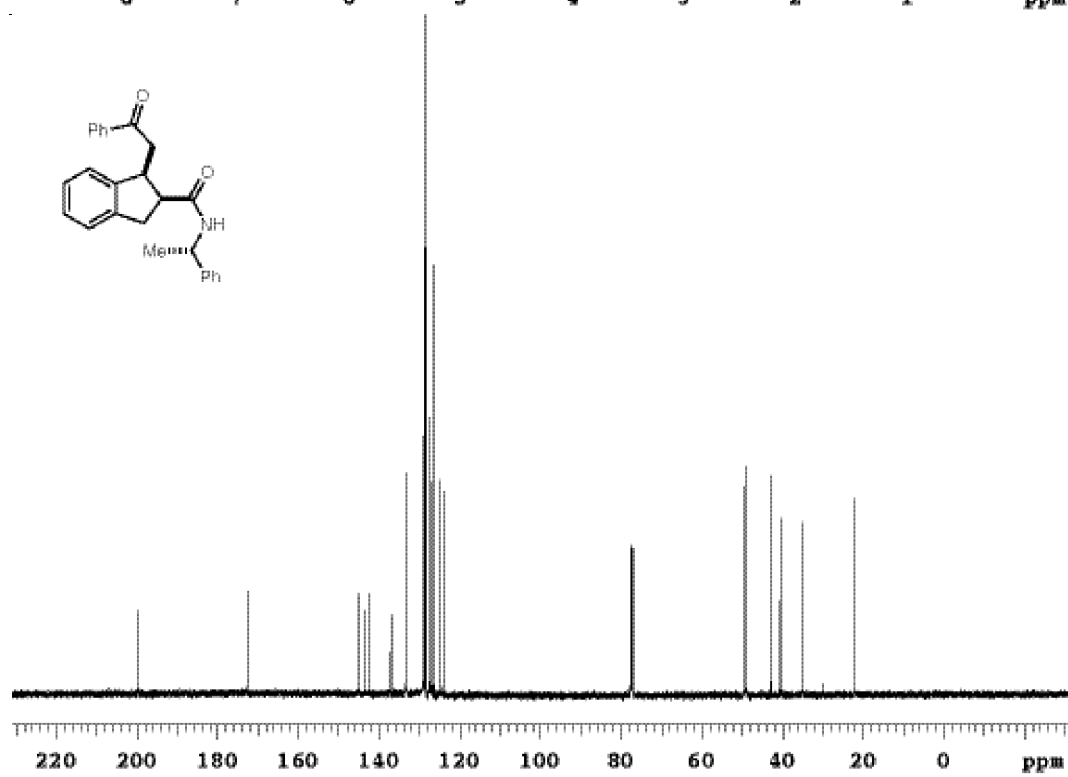

**HPLC and GC Traces of Racemic and Enantioenriched Compounds****Racemic 3**

Data File C:\HPCHEM\2\DATA\ERIC\EP-11501.D

Sample Name: EP2-115

racemic

```
=====
Injection Date   : 9/18/2006 4:21:21 PM
Sample Name      : EP2-115                      Location : Vial 41
Acq. Operator    : Eric                        Inj Volume : 5 µl
Acq. Method      : C:\HPCHEM\2\METHODS\EPROCKS.M
Last changed     : 9/18/2006 4:21:42 PM by Eric
                  (modified after loading)
Analysis Method  : C:\HPCHEM\2\METHODS\EPROCKS.M
Last changed     : 11/8/2006 1:11:17 AM by MANABU
                  (modified after loading)
=====
```

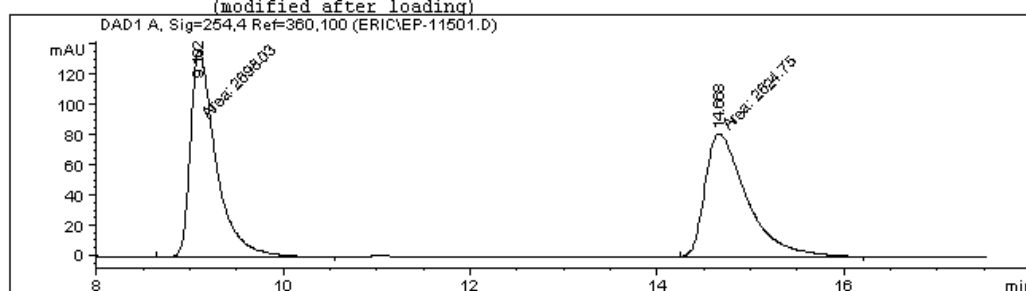

=====  
Area Percent Report  
=====

```
Sorted By      :      Signal
Multiplier     :      1.0000
Dilution       :      1.0000
Use Multiplier & Dilution Factor with ISTDs
```

Signal 1: DAD1 A, Sig=254,4 Ref=360,100

| Peak # | RetTime [min] | Type | Width [min] | Area [mAU*s] | Height [mAU] | Area %  |
|--------|---------------|------|-------------|--------------|--------------|---------|
| 1      | 9.102         | MM   | 0.3262      | 2698.03345   | 137.85426    | 50.6884 |
| 2      | 14.668        | MM   | 0.5318      | 2624.75024   | 82.25320     | 49.3116 |

Totals : 5322.78369 220.10747

Results obtained with enhanced integrator!

```
=====
*** End of Report ***
```

**Enantioenriched 3**

Data File C:\HPCHEM\2\DATA\ERIC\EP151.D

Sample Name: EP-02-151

chiral

```
=====
Injection Date   : 10/2/2006 8:36:28 AM
Sample Name      : EP-02-151                Location : Vial 41
Acq. Operator    : mmb                      Inj Volume : 5 µl
Acq. Method      : C:\HPCHEM\2\METHODS\EPROCKS.M
Last changed     : 10/2/2006 8:26:26 AM by mmb
                  (modified after loading)
Analysis Method  : C:\HPCHEM\2\METHODS\EPROCKS.M
Last changed     : 11/8/2006 1:10:55 AM by MANABU
                  (modified after loading)
=====
```

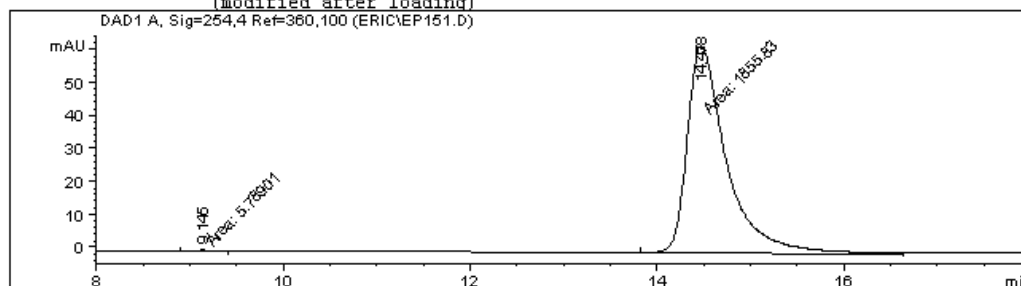

=====  
Area Percent Report  
=====

```
Sorted By      : Signal
Multiplier     : 1.0000
Dilution       : 1.0000
Use Multiplier & Dilution Factor with ISTDs
```

Signal 1: DAD1 A, Sig=254,4 Ref=360,100

| Peak # | RetTime [min] | Type | Width [min] | Area [mAU*s] | Height [mAU] | Area %  |
|--------|---------------|------|-------------|--------------|--------------|---------|
| 1      | 9.145         | MM   | 0.3217      | 5.78901      | 2.99910e-1   | 0.3110  |
| 2      | 14.478        | MM   | 0.4919      | 1855.82959   | 62.87340     | 99.6890 |

Totals : 1861.61860 63.17331

Results obtained with enhanced integrator!

=====  
\*\*\* End of Report \*\*\*

**Racemic 4**

Data File C:\HPCHEM\2\DATA\MANABU\PH.D

Sample Name: Ph

AD-H 15%

```
=====
Injection Date   : 11/7/2006 1:43:14 PM
Sample Name     : Ph                               Location : Vial 1
Acq. Operator   : MANABU                          Inj Volume : 20 µl
Acq. Method     : C:\HPCHEM\2\METHODS\EPROCKS.M
Last changed    : 11/7/2006 1:50:58 PM by MANABU
                  (modified after loading)
Analysis Method : C:\HPCHEM\2\METHODS\EPROCKS.M
Last changed    : 11/7/2006 1:57:43 PM by MANABU
                  (modified after loading)
=====
```

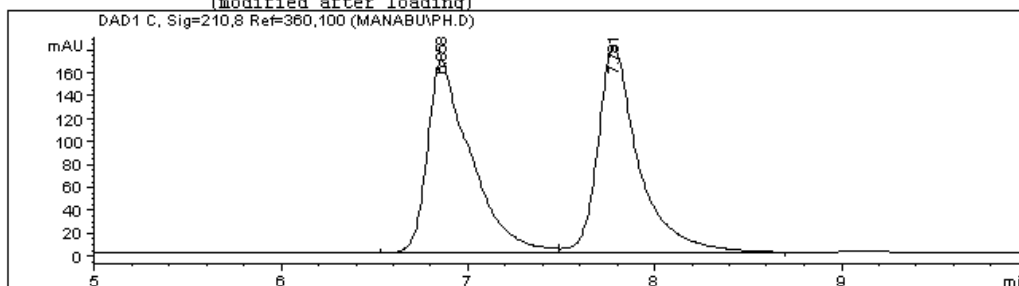

```
=====
Area Percent Report
=====
```

```
Sorted By      : Signal
Multiplier     : 1.0000
Dilution      : 1.0000
Use Multiplier & Dilution Factor with ISTDs
```

Signal 1: DAD1 C, Sig=210,8 Ref=360,100

| Peak # | RetTime [min] | Type | Width [min] | Area [mAU*s] | Height [mAU] | Area %  |
|--------|---------------|------|-------------|--------------|--------------|---------|
| 1      | 6.858         | VV   | 0.2233      | 2700.54321   | 168.21289    | 49.6053 |
| 2      | 7.781         | VB   | 0.2192      | 2743.51733   | 180.64406    | 50.3947 |

Totals : 5444.06055 348.85695

Results obtained with enhanced integrator!

```
=====
*** End of Report ***
=====
```

**Enantioenriched 4**

Data File C:\HPCHEM\2\DATA\ERIC\EP02203.D

Sample Name: EP-02-203

pure

```
=====
Injection Date   : 10/30/2006 10:46:54 AM
Sample Name      : EP-02-203                Location : Vial 41
Acq. Operator    : mmb                      Inj Volume : 5 µl
Acq. Method      : C:\HPCHEM\2\METHODS\EPROCKS.M
Last changed     : 10/30/2006 9:17:03 AM by mmb
                  (modified after loading)
Analysis Method  : C:\HPCHEM\2\METHODS\SCHWIN1.M
Last changed     : 11/7/2006 4:48:54 PM by MANABU
                  (modified after loading)
=====
```

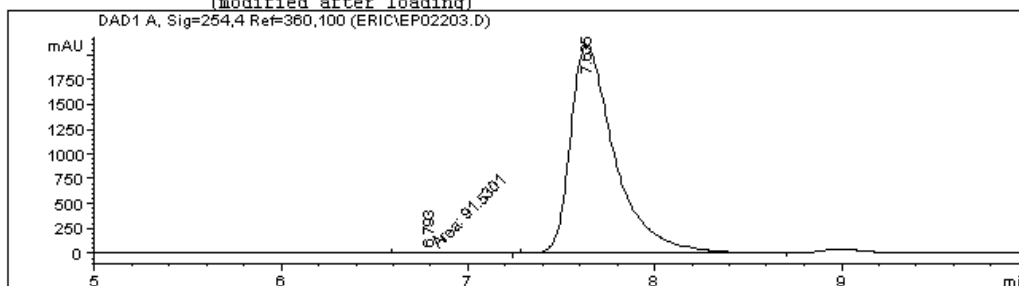

```
=====
                          Area Percent Report
=====
```

```
Sorted By      :      Signal
Multiplier     :      1.0000
Dilution       :      1.0000
Use Multiplier & Dilution Factor with ISTDs
```

Signal 1: DAD1 A, Sig=254,4 Ref=360,100

| Peak # | RetTime [min] | Type | Width [min] | Area [mAU*s] | Height [mAU] | Area %  |
|--------|---------------|------|-------------|--------------|--------------|---------|
| 1      | 6.793         | MM   | 0.2606      | 91.53013     | 5.85323      | 0.2630  |
| 2      | 7.635         | BV   | 0.2500      | 3.47052e4    | 2086.98047   | 99.7370 |

Totals : 3.47967e4 2092.83370

Results obtained with enhanced integrator!

```
=====
*** End of Report ***
=====
```

**Racemic 5**

Data File C:\HPCHEM\2\DATA\MANABU\BR200001.D

Sample Name: br2

```
=====
Injection Date   : 11/14/2006 2:53:31 PM
Sample Name      : br2                      Location : Vial 35
Acq. Operator    : DAN                      Inj Volume : 5 µl
Acq. Method      : C:\HPCHEM\2\METHODS\EPROCKS.M
Last changed     : 11/14/2006 2:52:08 PM by DAN
                  (modified after loading)
Analysis Method  : C:\HPCHEM\2\METHODS\EPROCKS.M
Last changed     : 11/14/2006 3:24:30 PM by DAN
                  (modified after loading)
=====
```

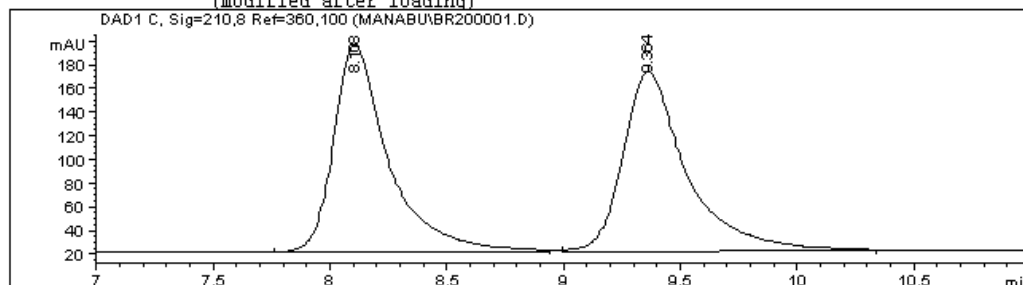

```
=====
                        Area Percent Report
=====
```

```
Sorted By      : Signal
Multiplier     : 1.0000
Dilution       : 1.0000
Use Multiplier & Dilution Factor with ISTDs
```

Signal 1: DAD1 C, Sig=210,8 Ref=360,100

| Peak # | RetTime [min] | Type | Width [min] | Area [mAU*s] | Height [mAU] | Area %  |
|--------|---------------|------|-------------|--------------|--------------|---------|
| 1      | 8.108         | BB   | 0.2363      | 2841.84619   | 174.22916    | 49.9502 |
| 2      | 9.364         | BB   | 0.2760      | 2847.51367   | 151.02719    | 50.0498 |

Totals : 5689.35986 325.25635

Results obtained with enhanced integrator!

```
=====
*** End of Report ***
```

**Enantioenriched 5**

Data File C:\HPCHEM\2\DATA\MANABU\BR200002.D

Sample Name: br2

```
=====
Injection Date   : 11/14/2006 3:09:10 PM
Sample Name      : br2                      Location : Vial 55
Acq. Operator    : DAN                      Inj Volume : 5 µl
Acq. Method      : C:\HPCHEM\2\METHODS\EPROCKS.M
Last changed     : 11/14/2006 2:52:08 PM by DAN
                  (modified after loading)
Analysis Method  : C:\HPCHEM\2\METHODS\EPROCKS.M
Last changed     : 11/14/2006 3:23:59 PM by DAN
                  (modified after loading)
=====
```

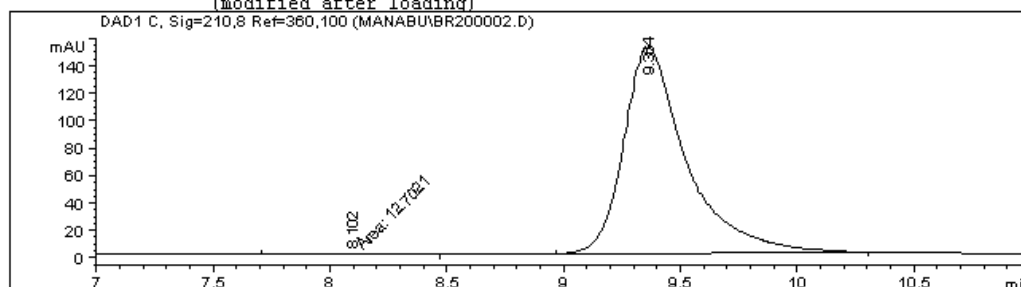

```
=====
                        Area Percent Report
=====
```

```
Sorted By      : Signal
Multiplier     : 1.0000
Dilution       : 1.0000
Use Multiplier & Dilution Factor with ISTDs
```

Signal 1: DAD1 C, Sig=210,8 Ref=360,100

| Peak # | RetTime [min] | Type | Width [min] | Area [mAU*s] | Height [mAU] | Area %  |
|--------|---------------|------|-------------|--------------|--------------|---------|
| 1      | 8.102         | MM   | 0.4302      | 12.70207     | 4.92102e-1   | 0.4484  |
| 2      | 9.364         | BB   | 0.2727      | 2820.13818   | 150.45482    | 99.5516 |

Totals : 2832.84025 150.94692

Results obtained with enhanced integrator!

```
=====
*** End of Report ***
```

**Racemic 6**

Data File C:\HPCHEM\2\DATA\MANABU\MW102606.D

Sample Name: MW102606

```
=====
Injection Date   : 10/26/2006 9:55:28 AM
Sample Name      : MW102606
Acq. Operator    : mmb
Location         : Vial 1
Inj Volume       : 5 µl
Acq. Method      : C:\HPCHEM\2\METHODS\EPROCKS.M
Last changed     : 10/26/2006 8:25:54 AM by mmb
                  (modified after loading)
Analysis Method  : C:\HPCHEM\2\METHODS\EPROCKS.M
Last changed     : 11/7/2006 1:50:48 PM by MANABU
                  (modified after loading)
```

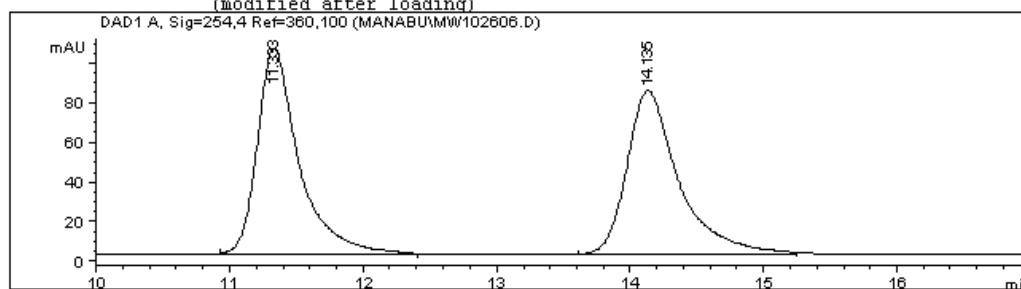

```
=====
Area Percent Report
=====
```

```
Sorted By       : Signal
Multiplier      : 1.0000
Dilution        : 1.0000
Use Multiplier & Dilution Factor with ISTDs
```

Signal 1: DAD1 A, Sig=254,4 Ref=360,100

| Peak # | RetTime [min] | Type | Width [min] | Area [mAU*s] | Height [mAU] | Area %  |
|--------|---------------|------|-------------|--------------|--------------|---------|
| 1      | 11.333        | BB   | 0.3161      | 2243.50635   | 103.81903    | 50.2785 |
| 2      | 14.135        | BB   | 0.3961      | 2218.65283   | 82.40121     | 49.7215 |

Totals : 4462.15918 186.22025

Results obtained with enhanced integrator!

```
=====
*** End of Report ***
```

**Enantioenriched 6**

Data File C:\HPCHEM\2\DATA\MANABU\MEO10000.D

Sample Name: Me01

chiral

```
=====
Injection Date   : 11/7/2006 10:50:57 PM
Sample Name      : Me01                      Location : Vial 41
Acq. Operator    : MANABU                    Inj Volume : 5 µl
Acq. Method      : C:\HPCHEM\2\METHODS\EPROCKS.M
Last changed     : 10/5/2006 10:43:41 AM by mmb
Analysis Method  : C:\HPCHEM\2\METHODS\EPROCKS.M
Last changed     : 11/7/2006 11:36:55 PM by MANABU
                  (modified after loading)
```

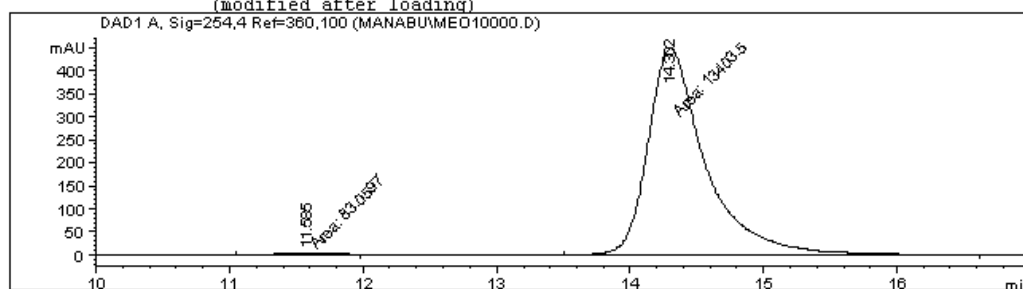

=====  
Area Percent Report  
=====

```
Sorted By      : Signal
Multiplier     : 1.0000
Dilution       : 1.0000
Use Multiplier & Dilution Factor with ISTDs
```

Signal 1: DAD1 A, Sig=254,4 Ref=360,100

| Peak # | RetTime [min] | Type | Width [min] | Area [mAU*s] | Height [mAU] | Area %  |
|--------|---------------|------|-------------|--------------|--------------|---------|
| 1      | 11.585        | MM   | 0.3698      | 83.05973     | 3.74339      | 0.6159  |
| 2      | 14.302        | MM   | 0.4989      | 1.34035e4    | 447.73129    | 99.3841 |

Totals : 1.34866e4 451.47468

Results obtained with enhanced integrator!

=====  
\*\*\* End of Report \*\*\*

**Racemic 7**

Data File C:\HPCHEM\2\DATA\MANABU\ME.D

Sample Name: Me

Me

```
=====
Injection Date   : 10/31/2006 1:44:44 PM
Sample Name      : Me                      Location : Vial 1
Acq. Operator    : mmb                    Inj Volume : 5 µl
Acq. Method      : C:\HPCHEM\2\METHODS\EPROCKS.M
Last changed     : 10/31/2006 1:43:34 PM by mmb
                  (modified after loading)
Analysis Method  : C:\HPCHEM\2\METHODS\EPROCKS.M
Last changed     : 11/7/2006 1:41:13 PM by MANABU
                  (modified after loading)
=====
```

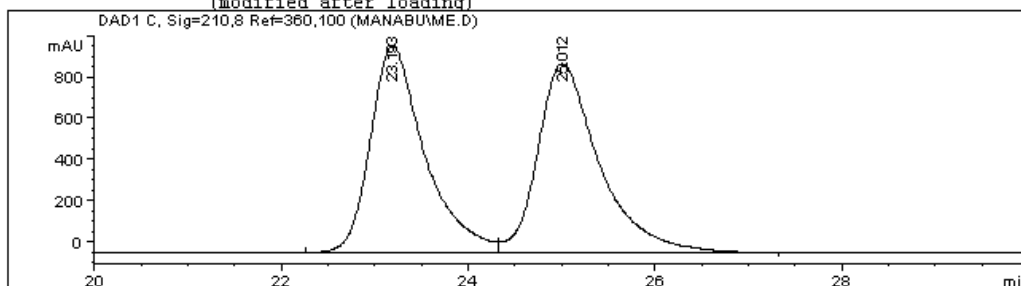

```
=====
Area Percent Report
=====
```

```
Sorted By      : Signal
Multiplier     : 1.0000
Dilution       : 1.0000
Use Multiplier & Dilution Factor with ISTDs
```

Signal 1: DAD1 C, Sig=210,8 Ref=360,100

| Peak # | RetTime [min] | Type | Width [min] | Area [mAU*s] | Height [mAU] | Area %  |
|--------|---------------|------|-------------|--------------|--------------|---------|
| 1      | 23.193        | BV   | 0.5958      | 4.05637e4    | 1003.09741   | 49.1400 |
| 2      | 25.012        | VB   | 0.6772      | 4.19836e4    | 918.57159    | 50.8600 |

Totals : 8.25473e4 1921.66901

Results obtained with enhanced integrator!

```
=====
*** End of Report ***
=====
```

**Enantioenriched 7**

Data File C:\HPCHEM\2\DATA\ERIC\EP02208.D

Sample Name: EP-02-208

ee

```
=====
Injection Date   : 10/31/2006 2:55:51 PM
Sample Name      : EP-02-208                Location : Vial 41
Acq. Operator    : mmb                      Inj Volume : 5 µl
Acq. Method      : C:\HPCHEM\2\METHODS\EPROCKS.M
Last changed     : 10/31/2006 2:55:59 PM by mmb
                  (modified after loading)
Analysis Method  : C:\HPCHEM\2\METHODS\SCHWIN1.M
Last changed     : 11/7/2006 4:51:25 PM by MANABU
                  (modified after loading)
=====
```

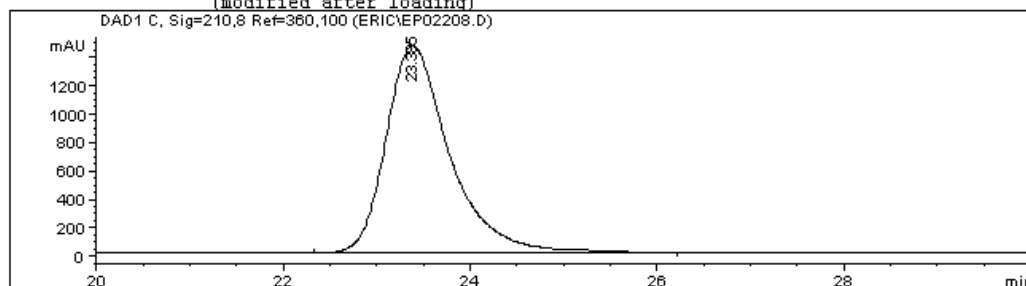

=====  
Area Percent Report  
=====

```
Sorted By      : Signal
Multiplier     : 1.0000
Dilution       : 1.0000
Use Multiplier & Dilution Factor with ISTDs
```

Signal 1: DAD1 C, Sig=210,8 Ref=360,100

| Peak # | RetTime [min] | Type | Width [min] | Area [mAU*s] | Height [mAU] | Area %   |
|--------|---------------|------|-------------|--------------|--------------|----------|
| 1      | 23.385        | BB   | 0.7088      | 6.87979e4    | 1451.85193   | 100.0000 |

Totals :                      6.87979e4 1451.85193

Results obtained with enhanced integrator!

=====  
\*\*\* End of Report \*\*\*

**Racemic 8**

Data File C:\HPCHEM\2\DATA\MANABU\CHORAC1.D

Sample Name: CHOrac

ee

```
=====
Injection Date   : 11/6/2006 10:08:03 PM
Sample Name      : CHOrac                      Location : Vial 1
Acq. Operator    : MANABU                      Inj Volume : 20 µl
Acq. Method      : C:\HPCHEM\2\METHODS\EPROCKS.M
Last changed     : 11/6/2006 10:10:19 PM by MANABU
                  (modified after loading)
Analysis Method  : C:\HPCHEM\2\METHODS\EPROCKS.M
Last changed     : 11/7/2006 1:37:49 PM by MANABU
                  (modified after loading)
=====
```

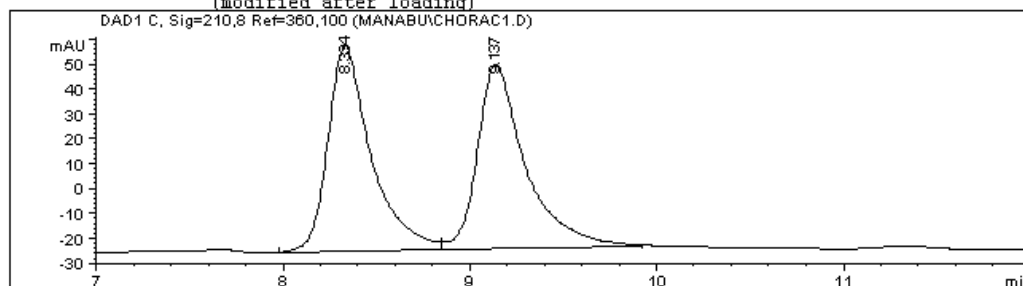

```
=====
                          Area Percent Report
=====
```

```
Sorted By      :      Signal
Multiplier     :      1.0000
Dilution       :      1.0000
Use Multiplier & Dilution Factor with ISTDs
```

Signal 1: DAD1 C, Sig=210,8 Ref=360,100

| Peak # | RetTime [min] | Type | Width [min] | Area [mAU*s] | Height [mAU] | Area %  |
|--------|---------------|------|-------------|--------------|--------------|---------|
| 1      | 8.334         | BV   | 0.2353      | 1322.68250   | 82.40218     | 49.9301 |
| 2      | 9.137         | VB   | 0.2607      | 1326.38330   | 74.13223     | 50.0699 |

Totals : 2649.06580 156.53441

Results obtained with enhanced integrator!

```
=====
*** End of Report ***
=====
```

**Enantioenriched 8**

Data File C:\HPCHEM\2\DATA\ERIC\EP02223.D

Sample Name: EP-02-223

ee

```
=====
Injection Date   : 11/6/2006 7:05:54 PM
Sample Name      : EP-02-223                Location : Vial 41
Acq. Operator    : MANABU                    Inj Volume : 5 µl
Acq. Method      : C:\HPCHEM\2\METHODS\EPROCKS.M
Last changed     : 11/6/2006 6:53:06 PM by MANABU
                  (modified after loading)
Analysis Method  : C:\HPCHEM\2\METHODS\SCHWIN1.M
Last changed     : 11/7/2006 4:30:06 PM by MANABU
                  (modified after loading)
=====
```

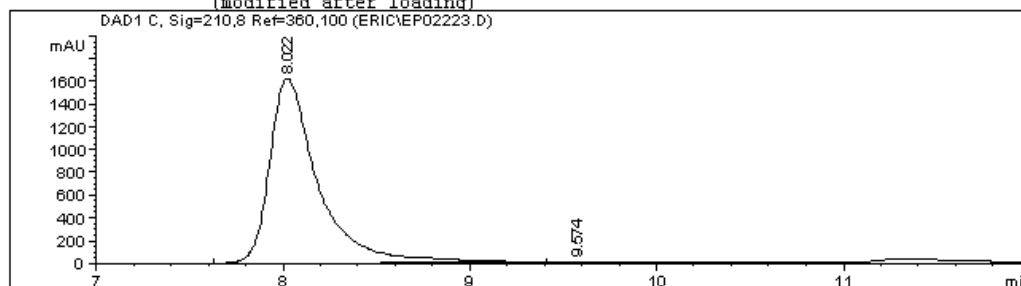

```
=====
                        Area Percent Report
=====
```

```
Sorted By      :      Signal
Multiplier     :      1.0000
Dilution       :      1.0000
Use Multiplier & Dilution Factor with ISTDs
```

Signal 1: DAD1 C, Sig=210,8 Ref=360,100

| Peak # | RetTime [min] | Type | Width [min] | Area [mAU*s] | Height [mAU] | Area %  |
|--------|---------------|------|-------------|--------------|--------------|---------|
| 1      | 8.022         | VB   | 0.2652      | 2.93498e4    | 1621.05823   | 99.3714 |
| 2      | 9.574         | BB   | 0.3618      | 185.65695    | 6.90183      | 0.6286  |

Totals :                    2.95354e4 1627.96006

Results obtained with enhanced integrator!

```
=====
*** End of Report ***
```

**Racemic 10**

Data File C:\HPCHEM\2\DATA\MANABU\F0000000.D

Sample Name: F

EtOH-IPA 2.5 2.5 Hex 99 0D-H

```
=====
Injection Date   : 11/2/2006 5:53:26 PM
Sample Name      : F                      Location : Vial 41
Acq. Operator    : mmb                      Inj Volume : 5 µl
Acq. Method      : C:\HPCHEM\2\METHODS\EPROCKS.M
Last changed     : 11/2/2006 5:51:22 PM by mmb
                  (modified after loading)
Analysis Method  : C:\HPCHEM\2\METHODS\EPROCKS.M
Last changed     : 11/7/2006 2:00:38 PM by MANABU
                  (modified after loading)
=====
```

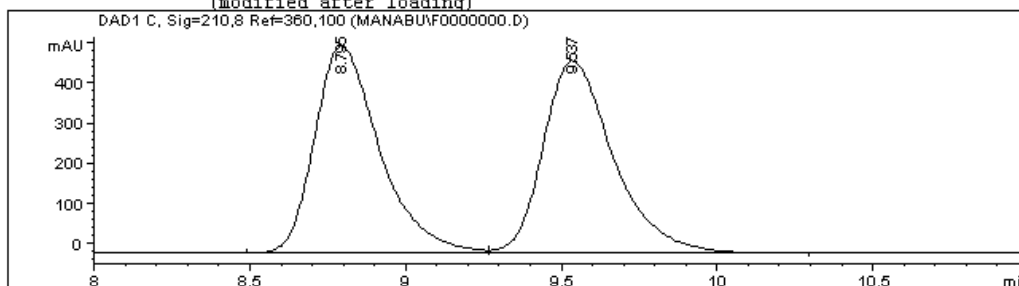

```
=====
Area Percent Report
=====
```

```
Sorted By      : Signal
Multiplier     : 1.0000
Dilution       : 1.0000
Use Multiplier & Dilution Factor with ISTDs
```

Signal 1: DAD1 C, Sig=210,8 Ref=360,100

| Peak # | RetTime [min] | Type | Width [min] | Area [mAU*s] | Height [mAU] | Area %  |
|--------|---------------|------|-------------|--------------|--------------|---------|
| 1      | 8.795         | BV   | 0.2195      | 7490.45801   | 515.46973    | 50.0240 |
| 2      | 9.537         | VB   | 0.2384      | 7483.25830   | 478.72235    | 49.9760 |

Totals : 1.49737e4 994.19208

Results obtained with enhanced integrator!

```
=====
*** End of Report ***
=====
```

**Enantioenriched 10**

Data File C:\HPCHEM\2\DATA\ERIC\EP2206-2.D

Sample Name: EP-02-206

ee

```
=====
Injection Date   : 11/2/2006 6:18:46 PM
Sample Name      : EP-02-206                Location : Vial 41
Acq. Operator    : mmb                      Inj Volume : 5 µl
Acq. Method      : C:\HPCHEM\2\METHODS\EPROCKS.M
Last changed     : 11/2/2006 5:51:22 PM by mmb
                  (modified after loading)
Analysis Method  : C:\HPCHEM\2\METHODS\SCHWIN1.M
Last changed     : 11/7/2006 4:50:23 PM by MANABU
                  (modified after loading)
=====
```

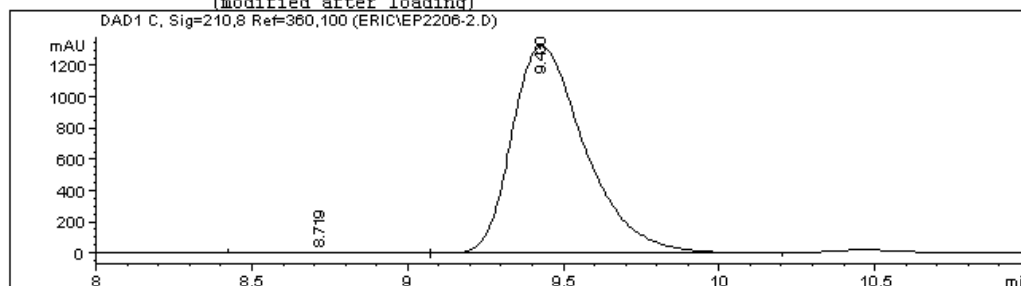

```
=====
                        Area Percent Report
=====
```

```
Sorted By      :      Signal
Multiplier     :      1.0000
Dilution       :      1.0000
Use Multiplier & Dilution Factor with ISTDs
```

Signal 1: DAD1 C, Sig=210,8 Ref=360,100

| Peak # | RetTime [min] | Type | Width [min] | Area [mAU*s] | Height [mAU] | Area %  |
|--------|---------------|------|-------------|--------------|--------------|---------|
| 1      | 8.719         | BV   | 0.2508      | 89.48604     | 5.41465      | 0.4114  |
| 2      | 9.430         | VB   | 0.2510      | 2.16637e4    | 1323.23816   | 99.5886 |

Totals : 2.17532e4 1328.65281

Results obtained with enhanced integrator!

```
=====
*** End of Report ***
=====
```

**Racemic 12**

Data File C:\HPCHEM\2\DATA\MANABU\2MEO.D

Sample Name: 2MeO

2MeO

```
=====
Injection Date   : 11/1/2006 1:30:46 PM
Sample Name     : 2MeO                      Location : Vial 1
Acq. Operator   : mmb                      Inj Volume : 5 µl
Acq. Method     : C:\HPCHEM\2\METHODS\EPROCKS.M
Last changed    : 11/1/2006 12:50:58 PM by mmb
                  (modified after loading)
Analysis Method : C:\HPCHEM\2\METHODS\EPROCKS.M
Last changed    : 11/7/2006 1:30:19 PM by MANABU
                  (modified after loading)
=====
```

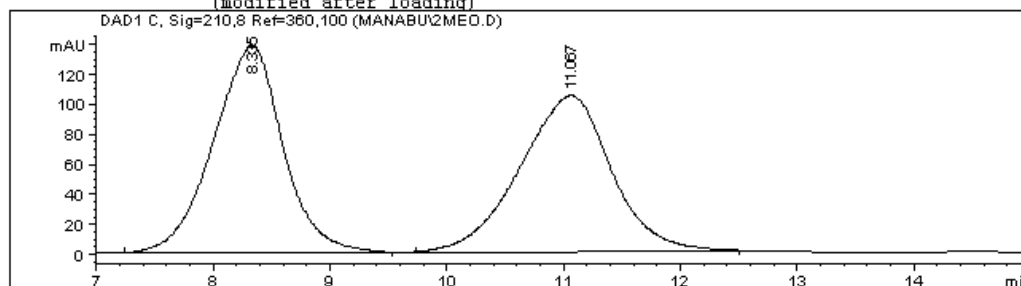

```
=====
                          Area Percent Report
=====
```

```
Sorted By      : Signal
Multiplier     : 1.0000
Dilution       : 1.0000
Use Multiplier & Dilution Factor with ISTDs
```

Signal 1: DAD1 C, Sig=210,8 Ref=360,100

| Peak # | RetTime [min] | Type | Width [min] | Area [mAU*s] | Height [mAU] | Area %  |
|--------|---------------|------|-------------|--------------|--------------|---------|
| 1      | 8.335         | BP   | 0.6417      | 5699.05176   | 137.46022    | 50.3045 |
| 2      | 11.067        | BB   | 0.8359      | 5630.04932   | 103.62591    | 49.6955 |

```
Totals :                      1.13291e4  241.08613
```

Results obtained with enhanced integrator!

```
=====
*** End of Report ***
=====
```

**Enantioenriched 12**

Data File C:\HPCHEM\2\DATA\ERIC\EP02207.D

Sample Name: EP-02-207

ee

```
=====
Injection Date   : 11/1/2006 9:18:58 PM
Sample Name      : EP-02-207                Location : Vial 41
Acq. Operator    : mmb                      Inj Volume : 5 µl
Acq. Method      : C:\HPCHEM\2\METHODS\EPROCKS.M
Last changed     : 11/1/2006 12:50:58 PM by mmb
                  (modified after loading)
Analysis Method  : C:\HPCHEM\2\METHODS\SCHWIN1.M
Last changed     : 11/7/2006 5:05:00 PM by MANABU
                  (modified after loading)
=====
```

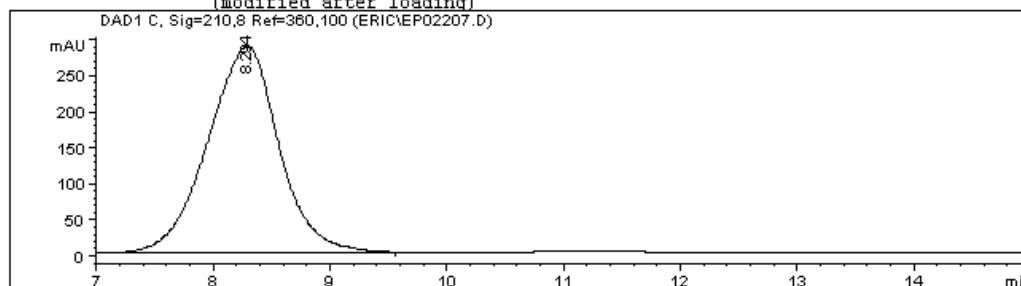

```
=====
                        Area Percent Report
=====
```

```
Sorted By      :      Signal
Multiplier     :      1.0000
Dilution       :      1.0000
Use Multiplier & Dilution Factor with ISTDs
```

Signal 1: DAD1 C, Sig=210,8 Ref=360,100

| Peak # | RetTime [min] | Type | Width [min] | Area [mAU*s] | Height [mAU] | Area %   |
|--------|---------------|------|-------------|--------------|--------------|----------|
| 1      | 8.294         | BB   | 0.6574      | 1.21844e4    | 286.96872    | 100.0000 |

```
Totals :                      1.21844e4  286.96872
```

Results obtained with enhanced integrator!

```
=====
                        *** End of Report ***
=====
```

**Racemic 14**

Data File C:\HPCHEM\1\DATA\MANABU\RACEMIC.D

Sample Name: racemic

alkyl

```
=====
Injection Date   : 11/6/06 3:29:49 PM
Sample Name      : racemic
Acq. Operator    : Manabu
Location         : Vial 21
Inj              : 1
Inj Volume       : 3 µl
Acq. Method      : C:\HPCHEM\1\METHODS\MW.M
Last changed     : 11/6/06 3:23:30 PM by BrianA
Analysis Method  : C:\HPCHEM\1\METHODS\MW.M
Last changed     : 11/7/06 9:21:13 PM by Manabu
                  (modified after loading)
To separate enantiomers of sec-phenethyl alcohol
```

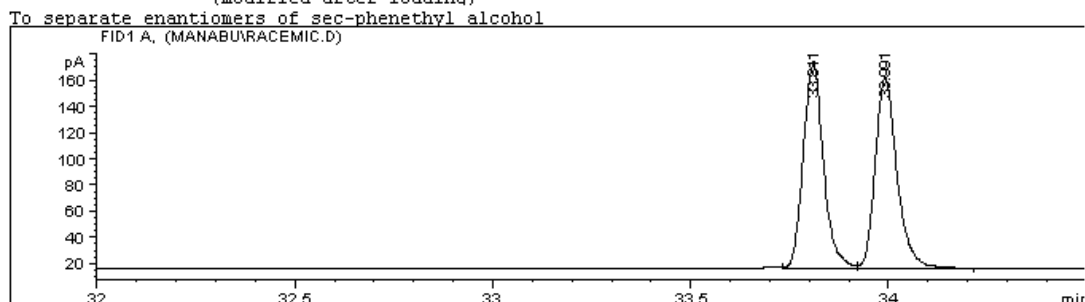

=====  
Area Percent Report  
=====

```
Sorted By      : Signal
Multiplier     : 1.0000
Dilution       : 1.0000
Sample Amount   : 1.00000 [ng/ul] (not used in calc.)
```

Signal 1: FID1 A,

| Peak # | RetTime [min] | Type | Width [min] | Area [pA*s] | Height [pA] | Area %   |
|--------|---------------|------|-------------|-------------|-------------|----------|
| 1      | 33.811        | VV   | 0.0496      | 562.08044   | 157.67152   | 50.12238 |
| 2      | 33.991        | VB   | 0.0560      | 559.33557   | 146.71539   | 49.87762 |

Totals : 1121.41602 304.38692

Results obtained with enhanced integrator!

=====  
\*\*\* End of Report \*\*\*

**Enantioenriched 14**

Data File C:\HPCHEM\1\DATA\MANABU\EE.D

Sample Name: ee

alkyl

```
=====
Injection Date   : 11/7/06 7:41:02 PM
Sample Name     : ee
Acq. Operator   : Manabu
Location        : Vial 25
Inj             : 1
Inj Volume      : 3 µl
Acq. Method     : C:\HPCHEM\1\METHODS\MW.M
Last changed    : 11/6/06 3:23:49 PM by BrianA
Analysis Method : C:\HPCHEM\1\METHODS\MW.M
Last changed    : 11/7/06 9:20:35 PM by Manabu
                  (modified after loading)
=====
```

To separate enantiomers of sec-phenethyl alcohol

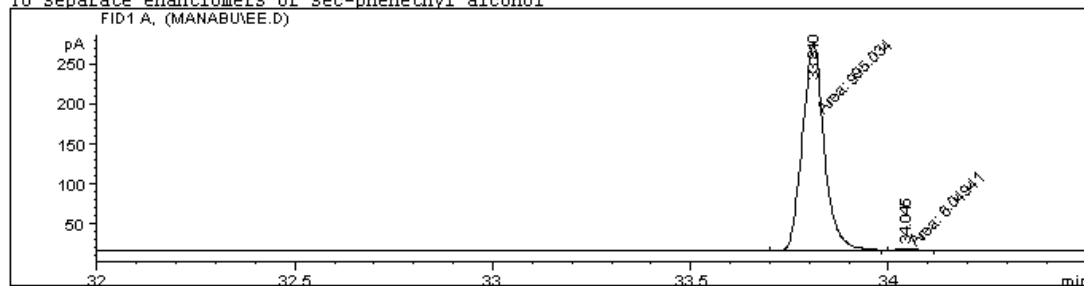

=====  
Area Percent Report  
=====

```
Sorted By      : Signal
Multiplier     : 1.0000
Dilution       : 1.0000
Sample Amount  : 1.00000 [ng/ul] (not used in calc.)
```

Signal 1: FID1 A,

| Peak # | RetTime [min] | Type | Width [min] | Area [pA*s] | Height [pA] | Area %   |
|--------|---------------|------|-------------|-------------|-------------|----------|
| 1      | 33.810        | MM   | 0.0641      | 995.03387   | 258.90158   | 99.39571 |
| 2      | 34.045        | MM   | 0.0540      | 6.04941     | 1.86830     | 0.60429  |

Totals : 1001.08329 260.76989

Results obtained with enhanced integrator!

=====  
\*\*\* End of Report \*\*\*

**X-Ray Crystallography of Amide 17**

X-ray diffraction was performed at  $-120\text{ }^{\circ}\text{C}$  and raw frame data were processed using SAINT. Molecular structure was solved using direct methods and refined by F2 by full-matrix least-squares techniques. The GOF = 1.084 for 267 variables refined to  $R1 = 0.0409$  for 4634 reflections with  $I > 2\sigma(I)$ . There was no absorption correction of Flack parameters. Further information is contained in the CIF file.
